28 impaired secretion. These findings overall highlight the structure of exocytotic insulin cores as a novel  
29 modality amenable to targeting in the stimulated exocytosis in  $\beta$ -cells with impaired insulin secretion.

30

## 31 **Introduction**

32 Exocytosis is the essential function of excitable and other secretory cells e.g. neurons, chromaffin cells  
33 and pancreatic  $\beta$ -cells. Defective exocytosis underlies disorders and diseases, including  
34 neurodegenerative diseases such as Alzheimer's disease, as well as type-2 diabetes (T2D). During the  
35 past decades, stimulated exocytosis has been thoroughly investigated, establishing the mechanisms  
36 through which the secretory machinery determines granule trafficking, docking, priming, fusion and  
37 refilling (Eliasson et al., 2008; Gandasi et al., 2018; Sudhof and Rothman, 2009). Exocytosis comprises  
38 granule tethering to the components of the cytoskeleton and calcium-triggered SNARE (soluble N-  
39 ethylmaleimide-sensitive factor attachment protein receptor) complex mediated priming and  
40 fusion(Sudhof and Rothman, 2009). In contrast to the molecular control of the triggering of exocytosis,  
41 how cargo components and structures contribute to the capacity of secretion remains to be elucidated.

42 Impaired insulin secretion from the pancreatic  $\beta$ -cells is the main cause of T2D (Lyssenko et al., 2008;  
43 Thurmond and Gaisano, 2020; Zhang et al., 2019), which is the most common endocrine disorder  
44 worldwide (Ligthart et al., 2016). Insulin is stored in dense-core granules in the  $\beta$ -cell, the release of  
45 which is evoked by a series of subcellular physiological events, including glucose transport and  
46 metabolization, ATP production in the mitochondria, closure of ATP-sensitive  $K^+$  channels, plasma  
47 membrane depolarization, and finally  $Ca^{2+}$  influx that triggers insulin granule fusion (Del Prato et al.,  
48 2002; Eliasson *et al.*, 2008; Thurmond and Gaisano, 2020). The insulin granule contains ~150 protein  
49 species, such as either granule membrane proteins or cargo contents (Hutton et al., 1982; Suckale and  
50 Solimena, 2010). Predominant granule transmembrane proteins include synaptotagmins and VAMP2  
51 (Regazzi et al., 1996). The latter is part of the SNARE complex, together with the plasma membrane  
52 proteins syntaxin 1 and SNAP25, controlling insulin secretion by regulating granule exocytosis  
53 (Andersson et al., 2012; Gandasi *et al.*, 2018; Ostenson et al., 2006; Rorsman and Renstrom, 2003;  
54 Thurmond and Gaisano, 2020). Inside the granule, insulin accounts for 50-60% of cargo protein content  
55 (Hutton *et al.*, 1982). The remainder comprises proteins such as islet amyloid polypeptide (IAPP, also  
56 known as amylin) that is co-secreted with insulin at ~1:3 ratio(Ogawa et al., 1990); GABA, which is  
57 estimated to account for 15% of total protein co-secreted with insulin; and IGF2(Cornu et al., 2009),

58 granins and granin-derived peptides, as well as prohormone convertases (Brunner et al., 2007), which  
59 play essential roles in insulin granule maturation and ensure processing of proinsulin to insulin. The  
60 prohormone convertases and soluble molecules in the granules, such as ATP, H<sup>+</sup>, Ca<sup>2+</sup> and Zn<sup>2+</sup>  
61 (necessary for the insulin crystal formation), are also crucial for maintaining granule function and release  
62 competence (Davidson et al., 1988; Lemaire et al., 2009; Orci et al., 1986). These cargo proteins,  
63 including insulin, form an ultrastructural electron-dense complex core detectable by transmission  
64 electron microscopy (TEM) (Hoboth et al., 2015; Nam et al., 2014). However, the pure insulin core,  
65 which excludes other cargo proteins, has not been defined by existing imaging methods and its putative  
66 function beyond simple storage form remains to be elucidated.

67 Direct stochastic optical reconstruction microscopy (dSTORM) has marked advantages with high-  
68 precision localization of single molecules beyond the optical resolution limit (Heilemann et al., 2008;  
69 Rust et al., 2006). Since detection is performed with standard fluorescent dyes, this method can be used  
70 in most biological samples and tissues to distinguish specific proteins, potentially contributing to  
71 pathological diagnosis (Hu et al., 2016; Mengistu et al., 2017). Several factors can affect the resolution  
72 of dSTORM imaging, of which the most important is the probe size (Dempsey et al., 2011). The probe  
73 complex, including primary, secondary antibodies (~10 nm each) and fluorescent dye, is more than 20  
74 nm in total size, which limits further increasing the resolution of detection in super-resolution imaging  
75 (Ries et al., 2012). Recently, a single domain (SD) antibody against insulin was developed with a  
76 remarkably smaller size (<2 nm) (Ries *et al.*, 2012; Rothbauer et al., 2006), which provides the possibility  
77 to improve the resolution of dSTORM images. Further, the SD antibody can pass small holes, e.g., the  
78 exocytotic granule's fusion pore, which averages a few nanometers. To this end, we developed a state-  
79 of-art method to image IGCs by using the anti-insulin SD antibody in combination with dSTORM.  
80 Using this approach, we demonstrated that the pure insulin core in the granule is dynamically changing  
81 during glucose stimulation and can be regulated by either granular proteins or extracellular stimuli.  
82 Furthermore, the size reduction is related to incomplete granule fusion and characterizes defective  
83 exocytosis in beta cells in T2D donors.

84

## 85 **Results**

86 **Detection of *in situ* IGCs using SD antibody probed by dSTORM imaging.** The recently developed  
87 SD antibody (1~2 nm, 10-15 kDa), is much smaller than common IgG antibodies (10 nm, 150-160 kDa)  
88 and therefore favourably for nano-scale imaging (Ries *et al.*, 2012). To take advantage of this size  
89 difference in structure imaging of insulin granule cores (IGCs), we performed the super-resolution  
90 dSTORM imaging with camelid SD antibodies against insulin in INS-1 832-13 cells. Although the cores  
91 can be detected with the normal IgG antibody by the dSTORM, the staining pattern of the insulin cores  
92 appeared scattered and irregular, with potentially unspecific dots (Figure 1A). In comparison, the SD  
93 antibody stained the insulin core in a condensed fashion with smooth and clear edges (Figure 1B, Figure  
94 S1A and B). We next measured the area, average diameter and perimeter of the insulin core. Interestingly,  
95 all insulin core parameters in SD antibody stainings were larger than those seen with IgG antibodies  
96 (Figure 1C and Figure S1C-E). With SD antibodies, the average core area and the perimeter was  
97  $14013 \pm 575 \text{ nm}^2$  and  $347 \pm 8.6 \text{ nm}$ , in comparison with the IgG antibody, respectively  $8149 \pm 306 \text{ nm}^2$  and  
98  $254 \pm 5.7 \text{ nm}$ . The average diameters of insulin cores binned into size groups showed that the population  
99 of insulin cores  $>100 \text{ nm}$  was increased 60% by SD antibody (Figure S1F), while the population of the  
100 small cores (40-60 nm) was increased by IgG antibody staining. In total, the average diameter of insulin  
101 cores stained by SD antibody was  $118 \pm 23 \text{ nm}$  and by IgG antibodies is  $83 \pm 13 \text{ nm}$  (Figure 1D). In  
102 contrast, with conventional imaging the average diameter of IGCs did not differ significantly between  
103 the two types of antibody (Figure 1E).

104 **SD antibody probes penetrate predominantly into insulin cores.** To evaluate whether the larger IGCs  
105 detected by SD antibodies reflects an according amount of insulin molecules, we next analyzed photon  
106 number and their locations in insulin cores. The analysis showed that the IGCs can be classified into  
107 three subpopulations: small (~60 nm), medium (~90 nm) and large (~120 nm) diameter insulin cores  
108 (Figure 1F-I). The photon density distribution (calculated by photon number per pixel) over an insulin  
109 core appeared irregular when staining with IgG antibodies (Figure 1J), indicating that the insulin within  
110 the cores was unsaturated with regards to binding insulin antibodies. In contrast, the SD antibody-stained  
111 IGCs appeared to display a more Gaussian distribution, particularly in the large subgroup of insulin

112 cores (Figure 1K). The blinking photons reflecting the bound SD antibodies were much higher in the  
113 large size cores, in which the average photon numbers were  $2585 \pm 210$  vs  $414 \pm 28$  in IgG-stained cores  
114 (Figure S1G, H). overall, these results demonstrate that insulin molecules within IGCs can be easily  
115 detected by the SD antibodies compared to IgG antibodies.

116 **IGCs with larger size locate near the plasma membrane.** To estimate the homogeneity of the spatial  
117 distribution of IGCs, we used two acquisition modes of the dSTORM imaging to detect the size of all  
118 insulin cores in intact cells: 1) epifluorescent mode (EPI) used to detect most insulin cores in the cytosol;  
119 2) total internal reflection (TIRF) mode used to visualize insulin cores near the plasma membrane (<  
120 150 nm) (Figure S2A). Under TIRF mode, the proportion of large-size (>80 nm) insulin cores accounted  
121 for >80% of insulin cores, while under EPI mode, <30% of insulin cores had a diameter larger than 80  
122 nm (Figure 2A-C). Accordingly, the area of insulin cores was  $\sim 25000 \text{ nm}^2$  by the TIRF mode, whereas,  
123 in the EPI mode, it was estimated to be only  $\sim 8000 \text{ nm}^2$  (Figure S2B). These large IGCs were  
124 preferentially located close to the plasma membrane. Next, the homogeneity of IGCs distribution was  
125 estimated by calculating the correlation between area and perimeter (Figure S2C). Compared to the EPI  
126 mode, the fitting curve of the plots under TIRF mode resulted in a linear distribution in the span of IGCs  
127 with large size, indicating that insulin cores tended to shift from elliptical shape to round when  
128 approaching the plasma membrane. These analyses showed that the shape of IGCs changes dynamically  
129 according to their position relative to the plasma membrane. This phenomenon may be linked to the  
130 exocytotic process.

131 **The exocytotic IGCs are detected under TIRF mode.** Exocytotic granules are large-dense core  
132 vesicles, which are supposed to be tethered and docked on the plasma membrane waiting for triggering  
133 signals in order to release their contents (Wang and Thurmond, 2009). To prove that the large IGCs are  
134 located in the exocytotic granules, we co-stained insulin with Vamp2, a membrane marker of exocytotic  
135 granules (Regazzi *et al.*, 1996) by two-colour dSTORM imaging (Figure 2D). Fortunately, using an IgG  
136 Vamp2 antibody, we could clearly acquire the dSTORM images of Vamp2, likely because of their  
137 scattered distribution in the granule membrane (Figure S2D and F). The colocalization of the insulin  
138 cores and VAMP2 was preferentially observed juxta-plasma membrane rather than in the cytosol (Figure

139 [S2E and G](#)). Statistically, the IGCs that colocalized with Vamp2 were  $63\pm 3\%$  at the plasma membrane  
140 concomitant with  $34\pm 6\%$  in the cytosol ([Figure 2E](#)). However, the percentage of Vamp2, which  
141 colocalized with insulin cores, did not differ between cytosol and plasma membrane ([Figure 2F](#)),  
142 indicating that Vamp2 has no preferable selection for its physical locations in the cells. However, the  
143 IGCs that colocalized with Vamp2 were larger than that not colocalizing ([Figure 2G](#)). These results  
144 suggest that exocytotic IGCs with large sizes located at the plasma membrane are ready for secretion.

#### 145 **Granule proteins participate in the regulation of IGC size and proinsulin/insulin composition.**

146 Proteomics analysis showed that 51 proteins reside in Vamp2 marked exocytotic granules(Hickey et al.,  
147 2009). Among these, we have selected 11 candidates (CPE, Znt8, ChgA, Eno 1, ATP6V0a1, ATP6V1a,  
148 Ctsd, Pdia3, Pcsk2, Nucb2) to assess their roles in the regulation of IGC's morphology. After silencing  
149 the proteins individually in INS-1 832-13 cells ([Figure S3A](#)), the size of the IGCs located in the cytosol  
150 or juxta-plasma membrane were detected by dSTORM imaging under EPI or TIRF mode, respectively.  
151 Of note, silencing Pcsk2 (Prohormone Convertase 2) or Nucb2 (Nucleobindin 2) significantly increased  
152 the cytosolic core sizes under EPI mode, while silencing CPE (Carboxypeptidase E), PDIA3 (Protein  
153 Disulfide Isomerase-Associated 3), or Ctsd (Cathepsin D) enlarged the juxta-membrane cores visualized  
154 under TIRF mode ([Figure 3A and 3B](#)). Besides the size, the core shape is indicated by the polarizability  
155 index ([Figure S3B](#)), which shows the shift of insulin cores from elliptical to round shape. The index of  
156 polarizability is 1 for the absolute round IGCs, while the value is approximately 0 in the long elliptical  
157 shape. The cytosolic IGCs detected by EPI mode yield  $0.47\pm 0.06$  with a slight oval shape. The  
158 polarizability index of surface insulin cores was  $0.58\pm 0.05$  and slightly rounder than cytosolic insulin  
159 cores ([Figure 3C and D](#)). Especially silencing Eno1 caused rounder shape than control significantly  
160 under TIRF mode ( $0.70\pm 0.03$  vs  $0.58\pm 0.05$ ) ([Figure 3D](#)). These analyses showed that certain granule  
161 proteins such as Nucb2 and Eno-1 are required for maintaining the IGC structure and shape.

162 To corroborate the effects of the granule proteins on the size of IGCs, we performed transmission  
163 electron microscopy (TEM) imaging in  $\beta$  cells and analyzed the core size under the silencing conditions  
164 ([Figure 3E](#)). In line with the results from dSTORM imaging, IGCs were enlarged after silencing Nucb2  
165 and Eno1 ([Figure 3F](#)). Silencing the granular  $H^+$  transporters, either cytosolic V1 domain ATP6V1a, or

166 transmembrane V0 domain ATP6V0a1 (Figure 3A and B), did not result in changes in sizes of IGCs, as  
167 detected by dSTORM imaging. Pharmacological inhibition of the H<sup>+</sup> transporter by Bafilomycin A1  
168 also failed to change the IGCs sizes even though it was concomitant with reducing the number of insulin  
169 granules (Figure S3C, D). However, the IGCs size was significantly reduced in ATP6V1a silenced cells  
170 by TEM imaging (Figure 3F). As TEM detects the whole core electron density rather than insulin  
171 molecule density, we surmise that the altered H<sup>+</sup> content in granules changes the  
172 composition/conformation of other proteins without affecting the insulin cores.

173 To test whether these proteins involved in regulating IGCs size participate in insulin secretory function,  
174 we firstly measured proinsulin and insulin content in the Nucb 2 or Eno1 silenced INS-1 cells (Figure  
175 3G-I). In contrast to the increased size of IGCs in Nucb2-silenced cells (Figure 3A), the expression of  
176 proinsulin and insulin is rather decreased in the knock-down cells. However, the ratio of  
177 proinsulin/insulin indicated an increase of the proinsulin protein (Figure 3I and J). The amount of  
178 activity (50 mM KCl) but not 20 mM glucose-stimulated insulin secretion increased markedly in the  
179 Nucb2-silenced cells (Figure 3K and Figure S3E), consistent with the increased size of the IGCs in the  
180 cells. Meanwhile, silencing Eno-1 which polarized IGCs (Figure 3D) enhanced proinsulin and insulin  
181 expression, but KCl or glucose-stimulated insulin secretion was strongly inhibited (Figure 3L). These  
182 data demonstrate that Nucb2 and Eno-1 regulate insulin secretion by participating in the control of IGC's  
183 size and shape rather than control of insulin gene expression.

184 **The size of IGCs in human primary  $\beta$ -cells is reduced upon glucose stimulation.** To estimate the  
185 dynamic changes of exocytotic IGCs upon stimulation, we performed dSTORM imaging under TIRF  
186 mode on isolated primary human  $\beta$ -cells after incubation with 2.8 mM or 16.7 mM glucose (Figure 4A,  
187 B and Figure S4A). We found that stimulation with high glucose decreased the size of the insulin cores  
188 from  $121.78 \pm 3.5$  nm to  $103.26 \pm 2.2$  nm (Figure 4C), while the size measured by conventional  
189 microscopy remained unchanged (Figure 4D). Among the insulin cores, the population of larger sizes  
190 (>80 nm) decreased accordingly in response to the stimulation, while the population of smaller sizes  
191 ( $\leq 80$  nm) increased (Figure 4E). By co-staining with VAMP2, we further confirmed that the stimulation-  
192 induced reduction of the larger cores locate preferentially in the exocytotic granules but not in non-



193 exocytotic granules (Figure 4F and G). Accordingly, the size distribution of VAMP2 was also decreased  
194 after glucose stimulation (Figure 4H). However, the number of VAMP2-positive IGCs at the plasma  
195 membrane remained unchanged (Figure 4I). These results indicate that the stimulation-induced  
196 reduction of larger cores was not due to complete fusion but rather to incomplete granule fusion (kiss-  
197 and-run)(MacDonald et al., 2006).

198 We next measured the number of insulin molecules in IGCs by accounting active blinking photons,  
199 which indirectly indicates the binding of dyes to insulin molecules. Remarkably, the photon number  
200 within the insulin core was significantly lower after glucose stimulation (Figure S4B and C), showing  
201 that part of the insulin core was released. Moreover, we treated the cells with 5  $\mu$ M forskolin promoting  
202 incomplete fusion(MacDonald *et al.*, 2006). Surprisingly, forskolin blocked the size reduction induced  
203 by glucose stimulation, confirming that the size reduction depended on the incomplete fusion (Figure  
204 4J). In addition, the number of juxta-membrane insulin cores increased after forskolin treatment (Figure  
205 4K), providing evidence that incomplete fusion events occurred during the stimulation. Taken together,  
206 these results demonstrate that the reduction of the core size by glucose is due to the release of part of  
207 the insulin core through incomplete granule secretion.

208 **The releasable part of IGCs is secreted through incomplete fusion upon glucose stimulation.** To  
209 corroborate whether the size change is caused by the incomplete fusion, we developed a new protocol,  
210 which employs the SD antibody as a probe incorporating into IGCs during the glucose-stimulated  
211 granule fusion (Figure 5A). The diameter of the fusion pore of incomplete fusion is 1.8-6.3 nm  
212 depending on the species (Hanna et al., 2009), allowing the passage of the SD antibody (~1 nm). The  
213 INS-1 cells were treated with glucose from 5 min to 1 hour, followed by the measurement of  
214 incorporated SD-probes by dSTORM imaging. We found that a significant number of labelled IGCs  
215 were detected after 5 min stimulation (Figure 5B). Accordingly, the size of the IGCs (~90 nm, Figure  
216 S5A) with incomplete fusion was smaller than integral IGCs (118 $\pm$ 23 nm, Figure 1D). The number of  
217 labelled IGCs declined following the glucose stimulation, while the average IGCs size remained  
218 unchanged. We then checked which size of the IGCs population was altered during the one-hour  
219 stimulation. Notably, in this case, the increased population of small size IGCs (>50-70 nm) is reciprocal

220 to the decreased large IGCs. This reflects the releasable parts of the IGCs after incomplete fusion,  
221 detected predominantly at 5-min after stimulation with glucose (Figure 5C). This population represents  
222 the immediate releasable pool of the first phase in the phasic secretion (Gandasi et al., 2017). Later during  
223 the secretion, the large size of labelled IGCs (>100 nm) indicated the small releasable part was increased  
224 at 60-min stimulation. Taken together, these results confirm a dynamic change of the releasable zone in  
225 IGCs that reflects the glucose stimulation.

226 We next utilized the incomplete fusion protocol to assess whether this alteration of IGCs in the kiss-  
227 and-run model is a general phenomenon in healthy human beta cells as well as in primary mouse beta  
228 cells (Figure 5D and 5F). Similar distribution patterns of incomplete fusion events were observed in  
229 both cell types (Figure 5E, S5B). Of note, in the diabetic *db/db* mouse, the incomplete fusion events  
230 were not significantly changed after glucose stimulation, suggesting that the releasable zone in IGCs is  
231 defective in the diabetic mouse which indeed has impaired insulin secretion (Figure 5G) (Zhang *et al.*,  
232 2019). We further investigated the change of the releasable part in IGCs under the incomplete granule  
233 fusion by treatment with 5  $\mu$ M forskolin, which promotes the fusion (Hanna *et al.*, 2009). Forskolin  
234 treatment increased the population of small and medium sizes, but not the large size IGCs population in  
235 healthy human and mouse beta cells (Figure 5H and I). This confirms that a population of IGCs with a  
236 larger releasable zone was released upon forskolin treatment. Consistently, Forskolin did not affect the  
237 already decreased IGCs size in the *db/db* mouse (Figure 5J), indicating a defect in the releasable part in  
238 the IGCs.

239 **The size of IGCs is reduced in human diabetic  $\beta$ -cells.** To further verify whether the defect of the  
240 releasable zone in IGCs also exists in another diabetic animal model, we next measured the core sizes  
241 in *Akita* (*Ins2*<sup>+/-</sup>) mice, which have a point mutation of the *ins2* gene, leading to incorrect folding and  
242 processing of proinsulin in the  $\beta$ -cells, resulting in the development of severe hyperglycemia (Hong et  
243 al., 2007). Similarly, the size of the IGCs docked on the plasma membrane (under TIRF mode) was  
244 significantly reduced in cells from *Akita* mice when compared to non-diabetic control mice (Figure 6A).  
245 In contrast, the size of IGCs in cytosolic granules (under EPI mode) was not different (Figure 6B).  
246 Accordingly, photon numbers within the IGCs were also lower in cells from *Akita* mice (Figure S6A).

247 The size of IGCs that colocalized with Vamp2 was slightly smaller in *Akita* mice (Figure S6B). In  
248 addition, acute stimulation with 16.7 mM glucose of  $\beta$ -cells from *Akita* mice had no effect on the IGCs  
249 sizes (Figure 6C). These results showed that the releasable part of the insulin cores in the diabetic  $\beta$ -  
250 cells is diminished or deranged, further suggesting that reducing the releasable zone correlates with the  
251 inhibition of proinsulin cleavage and insulin secretion.

252 We next tested whether the reduction of the releasable part of the IGCs is present in human diabetic beta  
253 cells. To this end, we performed dSTORM imaging in intact paraffin-embedded human pancreases from  
254 diabetic and non-diabetic donors (Figure 6D and E). The sizes of IGCs in the three healthy donors were  
255  $91.6 \pm 11.1$  nm,  $88.5 \pm 9.4$  nm,  $97.2 \pm 13.4$  nm, while in T2D donors, the IGCs size was significantly smaller  
256 with  $86.2 \pm 4.4$  nm,  $85.7 \pm 1.8$  nm,  $76.5 \pm 3.8$  nm, respectively (Figure 6F). Despite the large variability  
257 observed in the samples from healthy donors, a tendency for decreased photon numbers was clear  
258 (Figure S6C), indicating reduction of insulin molecules in the IGCs. The correlation analysis of IGCs  
259 size with glycated blood hemoglobin A1c (HbA1c) showed a strong negative correlation ( $r^2=0.73$ )  
260 (Figure 6G). These findings indicate that reduction of the releasable zone in IGCs may result in defective  
261 exocytosis and contribute to the development of diabetes.

262

## 263 Discussion

264 Using super-resolution dSTORM imaging combined with single-domain (SD) antibody, we provide  
265 evidence that the structure of the IGCs is dynamically changed in response to extracellular stimuli,  
266 secreting their releasable zone during the stimulation. Our unprecedented protocol enabled us to  
267 specifically characterize the ultrastructure of IGCs of the *in situ* granules and to describe a defect of the  
268 structure within IGCs in diabetic pancreatic  $\beta$ -cells.

269 dSTORM imaging provides considerable advantages to reveal the unknown ultrastructure of insulin  
270 granules at the subcellular level. However, this application meets practical challenges to reach the super-  
271 resolution due to the limitations such as the size of antibodies. The total length of the probe is usually  
272 larger than 20 nm, exceeding ten times the size of SD antibody (1-2 nm). This feature makes SD antibody  
273 particularly suitable for high-accurate imaging compared to conventional IgG antibody (Figure 1A-E).  
274 Besides the resolution, the size heterogeneity of IGCs in beta cells is also a challenging obstacle for  
275 acquiring results. Using a combination of EPI and TIRF mode in dSTORM imaging, we can distinguish  
276 the variations of the insulin cores at different cellular locations (Figure 2C and S2A-C). For example,  
277 the large insulin cores appear predominantly in exocytotic granules at the cell surface (Figure 2E),  
278 relative to the smaller ones found in the cytosol. This suggests that the larger IGCs in the exocytotic  
279 granule could be implicated in insulin secretion. However, while many factors controlling granule  
280 exocytosis have been defined, such as granule size, location, age and movement dynamics (Duncan et  
281 al., 2003; Eliasson *et al.*, 2008; Zhang *et al.*, 2019), the role of the size or structure of IGCs have not  
282 been established. This is mainly due to the lack of specific tools such as dSTORM imaging.

283 According to the models of granule exocytosis, the IGCs changes during glucose-stimulated insulin  
284 secretion also can be categorized as 1) complete fusion of the large-size insulin core (Tsuboi et al., 2006),  
285 2) incomplete fusion of part of the cores (MacDonald *et al.*, 2006). Our current results support the latter  
286 since we have observed that upon acute stimulation by 16.7 mM glucose, most of the IGCs size reduction  
287 is due to the secretion of its releasable part both in the INS-1 cells and human  $\beta$ -cells (Figure 4J and K,  
288 Figure 5). We hypothesized that the insulin core exists as distinct parts: a releasable zone, secreted after  
289 stimulation and an unreleasable zone retained after stimulation. The releasable zone is defective and

290 shrunk in diabetic  $\beta$ -cells, and the full size of IGCs remains unchanged after glucose stimulation (Figure  
291 6H).

292 It was long thought that the secretory capacity is only dependent on the secretory machinery formed by  
293 the SNARE complex and associated elements (Rorsman and Renstrom, 2003; Sudhof and Rothman,  
294 2009). This view neglected the importance of the granule content, which defines the secretory volume  
295 depending on its physical size, releasable part and composition. Especially in the cases of incomplete  
296 fusion, it is critical that the structure of the IGC is capable of rapidly transforming and releasing part of  
297 the core through the fusion pore, generally sized 2-10 nm in diameter within seconds in the plasma  
298 membrane (Hanna *et al.*, 2009). Whether the core in the docked granule at the plasma membrane merely  
299 secretes its releasable part, or randomly releases any part of the core was unclear. By stimulation with 16.7  
300 mM glucose, we observed that the IGC size is reduced accordingly and acts in concert with the  
301 exocytotic machinery to fulfil the demand of secretion (Figure 5B). However, the molecular mechanism  
302 underlying the regulation of the conversion between the two IGC zones and their structural features need  
303 to be further investigated. For example, how the single IGC splits during incomplete fusion and what  
304 signal pathways regulate the separation, are open questions for understanding the mechanism. Probing  
305 the two parts and tracing their dynamics in response to the stimulation are likely to yield such  
306 information. In addition, investigation of dynamic changes of the granule compositions within IGCs by  
307 super-resolution imaging will be a new approach for the elucidation of the maturation and secretion  
308 competence of the insulin granule.

309 Besides the physical structure, the chemical composition in the IGCs has also recently been linked to  
310 insulin secretion. According to proteomics studies, the insulin secretory granule contains less than 150  
311 proteins (Brunner *et al.*, 2007; Schwartz *et al.*, 2012). The population of granular membrane proteins  
312 such as VAMP2 are involved in the regulation of granule intracellular trafficking and release by  
313 interaction with other signal molecules. The other major part of proteins participates in granule  
314 maturation, primarily regulating granular pH, ion concentration and enzyme catalytic activities (Schwartz  
315 *et al.*, 2012). It is essential to understand how the granular proteins contribute to regulate the IGC  
316 structure and further affect insulin secretion (Figure 3). For example, silencing the granular protein

317 Nucb2 (nucleobindin 2) decreases the amount of proinsulin/insulin (Figure 3H), though the stimulated  
318 insulin secretion is rather increased (Figure 3K). This is likely due to the enlargement of the insulin core  
319 size with larger releasable zone (Figure 3A). In contrast, knock-down of Eno-1 changes the IGCs shape  
320 from polarized state to rounder (Figure 3D), which is unfavorable for secretion of the releasable part of  
321 IGCs through incomplete fusion. The consequence is impaired glucose-stimulated insulin secretion  
322 (Figure 3L), while the total insulin amount is increased (Figure 3H). These results indicate that granular  
323 proteins appear to participate in the regulation of the insulin secretory process by changing the physical  
324 shape of the IGCs. However, the underlying mechanism connecting insulin core structure with secretion  
325 remains to be clarified. Future studies will define how other granular proteins and granular  
326 environmental factors such as pH, control the exocytotic process. Granular pH has been reported to be  
327 involved in the aggregation of granule content as well as conversion of proinsulin to insulin (Colomer  
328 et al., 1996). However, we were unable to observe significant changes of insulin core size by inhibition  
329 of the granular H<sup>+</sup> ATP pump either by silencing ATP6V0a1, ATP6V1a, or the pharmacological blocker  
330 Bafilomycin A. These results suggest an alternative way to compensate for the deficiency of granular  
331 H<sup>+</sup> and to reduce the risk of variation of intra-granular pH. Therefore, development of a new protocol to  
332 directly visualize the maturation of the insulin granule will enable us to provide more details about the  
333 insulin core structure and insulin maturation.

334 In summary, using a super-resolution dSTORM imaging combined with SD antibody, we characterized  
335 the structure changes of IGCs of insulin granule during glucose stimulation in pancreatic beta cells  
336 (Figure 6H). IGCs present in exocytotic granules appeared larger in size than cytosolic IGCs. The insulin  
337 granule proteins such as Nucb2 and Eno-1 participate in maintaining the size and shape of the IGCs,  
338 respectively. Glucose stimulation resulted in reduced size of the exocytotic IGCs by releasing their  
339 peripheral part “releasable zone”. This release mainly occurred in the granules displaying incomplete  
340 fusion during glucose stimulation. In the diabetic *db/db* and *Akita* mice as well as in type-2 diabetes  
341 donors, the size of the IGCs was significantly reduced. Moreover, the IGCs size was negatively  
342 correlated with the blood HbA1c concentration in the human donors. These findings overall highlight a

343 new strategy to regulate the stimulated secretion by targeting of the structure of exocytotic IGCs in  
344 insulin granules and may be extended to other hormone-containing granules as well as neural cells.

345

346 **Methods**

347 **Antibodies.** Anti-insulin VHH Single Domain Antibody tagged with biotin was purchased from  
348 Creative Biolabs (Cat# NAB-1554-VHH); guinea pig primary IgG anti-insulin antibody from  
349 EuroDiagnostica (B65-1); and mouse monoclonal anti-VAMP2 antibody from SYSY. The secondary  
350 anti-guinea pig and anti-mouse antibodies conjugated with fluorescence dyes Alexa 647, Alexa 546 and  
351 Alexa 488 were from donkey serum (Jackson Immuno Research).

352 **Animals**

353 All animal protocols in this study were performed in accordance with the Malmö/Lund Animal Care  
354 and Use Committee (5.2.18-10992/18) and abided by the Guide for the Care and Use of Laboratory  
355 Animals published by the Directive 2010/63/EU of the European Parliament.

356 Adult heterozygous diabetic Akita (*Ins2*<sup>+/-</sup>) mice (stock number 003548, C57BL/6J background) were  
357 obtained from The Jackson Laboratory and bred at our animal facility to generate Akita and non-diabetic  
358 wild-type littermates. Animals had free access to tap water and were fed normal chow diet. Blood  
359 glucose (CONTOUR® meter; Bayer) and body weight were monitored regularly after weaning at 4  
360 weeks of age. Only male mice were used because of the limited hyperglycemia observed in Akita female  
361 mice. Akita mice develop pronounced and sustained hyperglycemia from the 4<sup>th</sup> postnatal week. Mice  
362 were euthanized by cervical dislocation after anesthesia with 3% isoflurane in oxygen (2 L/min) from  
363 18 to 24 weeks of age, at the point the diabetes phenotype was confirmed by blood glucose >15 mmol/l  
364 in a drop of blood from a tail puncture.

365 Isolation of the mouse pancreatic islets was performed by retrograde injection of a collagenase solution  
366 via the pancreatic duct and the islets were then hand-picked in Hank's buffer (Sigma-Aldrich) with  
367 1 mg/ml BSA under a stereomicroscope at room temperature. The 60 islets were grouped and dispersed  
368 into single cells with calcium-free Hanks' buffer and seeded on a 12-cm glass-bottom dish. Before  
369 staining, the cells were incubated overnight in a humidified atmosphere in RPMI medium supplemented  
370 with 5 mM glucose, 10% (vol/vol) fetal bovine serum, 100 IU ml<sup>-1</sup> penicillin, 100 µg ml<sup>-1</sup> streptomycin.



371 **Cell culture.** INS-1 832/13 cells (kindly donated by Dr. C. B. Newgaard, Duke University, USA) were  
372 produced from rats and genetically inserted human insulin gene and secreting human insulin (Hohmeier  
373 et al., 2000). Cells from passage 60-70 were used and secretion was assayed regularly. Only cells with  
374 robust secretion (>10-fold stimulation by glucose) were selected for further staining. Before staining,  
375 INS-1 832/13 cells were cultured in RPMI-1640 (Gibco BRL, NY) with 11.2 mmol/l glucose and 2  
376 mmol/l l-glutamine. The medium was supplemented with 10% fetal bovine serum (Sigma, USA), 1  
377 mmol/l pyruvate, 10 mmol/l HEPES (Sigma, USA), 50  $\mu\text{mol/l}$  2-mercaptoethanol (Sigma, USA), 100  
378 units/ml penicillin, and 100  $\mu\text{g/ml}$  streptomycin (Thermo Fisher, USA). Cells were cultured on 100-mm  
379 Petri dishes (Nunc, USA) and incubated in 5% CO<sub>2</sub>/95% air at 37°C before transfer to the glass  
380 coverslips used for imaging.

381 **Isolation of human pancreatic islets.** Human pancreatic islets were obtained through the Exodiab  
382 Human Tissue Laboratory and the Nordic Network for Clinical Islet Transplantation (Prof. Olle  
383 Korsgren, Uppsala University, Sweden) (Axelsson et al., 2017). Briefly, the human pancreas was  
384 perfused with ice-cold collagenase, cut into pieces and placed in a digestion chamber at 37 °C. The  
385 separation of endocrine and exocrine tissues was achieved by a continuous density gradient. Selected  
386 fractions were then centrifuged to enrich for islets. The purity of islets was measured by dithizone  
387 staining. From this suspension, islets were hand-picked under a dissecting microscope. The islets  
388 were incubated in culture medium containing 5.6 mM glucose in CMRL-1066 (INC Biomedicals)  
389 supplemented with 10 mM HEPES, 2 mM L-glutamine, 50  $\mu\text{g ml}^{-1}$  gentamicin, 0.25  $\mu\text{g ml}^{-1}$   
390 Fungizone (GIBCO), 20  $\mu\text{g ml}^{-1}$  ciprofloxacin (Bayer Healthcare), 10 mM nicotinamide and 10%  
391 human serum at 37 °C (95% O<sub>2</sub> and 5% CO<sub>2</sub>) for 1–9 days before experiments. Donors were grouped  
392 according to HbA1c *i.e.* less than 6% (healthy), higher than 6.5% or history of diabetes (diabetic). There  
393 was no difference in islet purity between healthy and T2D donors.

394 **Isolation of primary pancreatic  $\beta$ -cells.** The handpicked islets were collected and grouped in batches  
395 of 120 islets. The islets were then added into 1 ml calcium-free isolation buffer containing (in mM) 138  
396 NaCl, 5.6 KCl, 1.2 MgCl<sub>2</sub>, 5 HEPES, 3 glucose, 1 EGTA and 1 mg/ml BSA (pH 7.4), followed by  
397 incubation to 37 °C water bath for 12 min. The  $\beta$ -cells are released from islets by mechanical

398 disruption pipetting down-up ~10 times. The disruption was stopped by addition of 9 ml culture medium.  
399 The cells were centrifuged by 1.500 rpm for 2 min and the supernatant discarded. The cells were re-  
400 suspended with 1 ml culture medium and gently pipetted. The resultant cell suspension was plated on  
401 glass-bottom dishes and maintained in culture medium for 24 h.

#### 402 **Knock-down of targeted proteins by siRNA silencing**

403 The small interfering RNA (siRNA) experiments of the targeted genes to CPE, ZnfT8, Chromogranin  
404 A, Eno 1, ATP6V0a1, ATP6V1a, Cathepsin D, PDIA3, PCSK2, Nucleobindin 2 and siRNA control #2  
405 were purchased from ThermoFisher Scientific, USA. Prior to transfection, INS-1 832/13 cells were  
406 seeded in six-well plates at a density of  $\sim 5 \times 10^5$  cells for 24 h and then transfected by Lipofectamine®  
407 RNAiMAX Transfection Reagent (Invitrogen, USA) according to the manufacturer's instructions. After  
408 transfection for 48 h or 72 h, the cells were collected for mRNA expression measurement.

409 To detect the knockdown efficacy of each targeted gene, qPCR was used to measure their expression  
410 after siRNA treatment. Total RNA from the cells was extracted using RNAeasy (Qiagen, Hilden,  
411 Germany). Concentration and purity of the RNA was measured with a NanoDrop ND-1000  
412 spectrophotometer (NanoDrop Technologies, DE) and RNA Quality Indicator (RQI) higher than 8.0  
413 (Experion Automated Electrophoresis, Bio-Rad, USA) was considered as high-quality total RNA  
414 preparations. 0.5  $\mu$ g RNA of each condition was used for cDNA synthesis with SuperScript KIT  
415 (Thermofisher Scientific, USA). For real-time PCR, a 10  $\mu$ l of reaction mixture with 20 ng cDNA, 5  $\mu$ l  
416 TaqMan Mastermix (Thermofisher Scientific, USA), and 100 nM TagMan gene expression assay (at a  
417 dilution of 0.05) was run in a 7900HT Fast Real-Time System. The amplification was performed: 50 °C  
418 for 2 min, 95 °C for 10 min, 40 cycles of 95 °C for 15 sec, and 60 °C for 1 min. The mRNA expression  
419 was calculated relative to the housekeeping gene HPRT mRNA in the same sample.

#### 420 **Stimulated insulin secretion in cultured cells**

421 The INS-1 832/13 cells were seeded on the 24-well plate and washed twice with SAB buffer (pH 7.2)  
422 containing 114 mM NaCl, 4.7 mM KCl, 1.2 mM KH<sub>2</sub>PO<sub>4</sub>, 1.16 mM MgSO<sub>4</sub>, 25.5 mM NaHCO<sub>3</sub>,  
423 2.6 mM CaCl<sub>2</sub>, 20 mM HEPES, 0.2% BSA before stimulation. For preincubation, SAB buffer

424 containing 2.8 mM glucose was added to the cells for 2 h at 37 °C. For glucose-stimulated insulin  
425 secretion, the cells were then incubated with buffer containing 16.7 mM glucose for 1 h. For high K<sup>+</sup>  
426 stimulated insulin secretion, the cells were incubated with buffer containing 50 mM KCl buffer  
427 containing for 10 min. Insulin concentration secreted from INS-1 832/13 cells was measured with rat  
428 insulin high range ELISA kit (Merckodia, Sweden) and normalized according to protein content per well.  
429 For protein and insulin content analysis, the cells were lysed with RIPA buffer (50 mM Tris HCl pH 8,  
430 150 mM NaCl, 1% NP-40/Triton X, 0.1% SDS, 0.5% sodium deoxycholate, 2 mM EDTA and 50 mM  
431 NaF) after stimulation. The lysate was centrifuged at 10,000g for 5 min (4 °C). The total protein and  
432 insulin content was directly analysed or samples stored at -20 °C for analysis later. Total protein was  
433 measured with the Pierce BCA Protein Assay Kit (Thermo Scientific).

434 **Immunostaining of cells.** INS-1 832/13 cells or primary human  $\beta$ -cells were seeded on the #1.5 (0.17  
435 mm) glass-bottom dishes (WillCo Well, Germany) for 24 hours prior to staining. For the staining, the  
436 cells received 2% PFA in PBS buffer pH 7.4 (containing 137 mM NaCl, 2.7 mM KCl, 8 mM Na<sub>2</sub>HPO<sub>4</sub>,  
437 and 2 mM KH<sub>2</sub>PO<sub>4</sub>) for 10~12 min to fix the cells and then the cells were permeabilized with Perm  
438 buffer (Thermo Fisher, USA) for 10 min. Unspecific binding was blocked by a buffer supplemented  
439 with 5% normal donkey serum in PBS. Guinea pig anti-insulin antibody (1:350), single domain anti-  
440 insulin antibody (1:200) or mouse anti-VAMP2 antibody (1:100) were diluted in the 5% donkey serum-  
441 containing PBS overnight. The samples were washed three times with a washing buffer (the blocking  
442 buffer plus 0.5% tween-20) for 10 min each time. For biotin-streptavidin binding, 1  $\mu$ M streptavidin-  
443 Alexa 647 in blocking buffer was added to the cells and placed at room temperature for 30-40 minutes.  
444 For primary and secondary antibody binding, anti-Guinea pig or anti-mouse secondary antibodies  
445 conjugated with Alexa488 or Alexa 546 were added to the cells for 2 hours. After the reaction, the cells  
446 were washed three times with the washing buffer with tween-20, but without donkey serum. The samples  
447 were stored at 4°C for dSTORM imaging within 3-4 days.

448 **Immunostaining for pancreas sections.** Formalin-fixed paraffin-embedded human T2D and control  
449 pancreatic sections with 5  $\mu$ m thickness were deparaffinised by multiple washing steps with washing  
450 solutions containing ethanol in concentrations from 99% to 50% and followed by heat-induced antigen

451 retrieval using Retrievit 2 buffer (Biogenex). The tissues were re-fixed by methanol plus 10% H<sub>2</sub>O<sub>2</sub> for  
452 10 min and washed with TBST buffer three times and each time for 3 min. The unspecific binding was  
453 blocked for 20 min by blocking buffer (5% normal donkey serum in PBS). For immunohistochemistry,  
454 the cells were allowed to react with the single domain anti-insulin antibody (1:200) or the primary  
455 antibodies guinea pig anti-insulin (1:400). Dye labelling was done with 1 μM Streptavidin-Alexa 647  
456 or the secondary antibody applied was Alexa 488-conjugated anti-guinea pig (1:400), respectively. The  
457 tissues were washed three times each time 10 min with washing buffer containing 0.5 tween-20. After  
458 washing the stained tissues were refrigerated (4°C) in a black box for dSTORM imaging within 3~5  
459 days.

460 ***In situ* detection of IGCs in granules during incomplete fusion.** INS-1 832/13 cells, primary human  
461 β-cells or primary mouse β-cells were seeded on the #1.5 (0.17 mm) glass-bottom dishes (WillCo Well,  
462 Germany) for 24 hours prior to staining. The cells were then washed with 1 ml secretion assay buffer  
463 (SAB) (114 mM NaCl, 4.7 mM KCl, 1.2 mM KH<sub>2</sub>PO<sub>4</sub>, 1.16 mM MgSO<sub>4</sub>, 25.5 mM NaHCO<sub>3</sub>, 2.6 mM  
464 CaCl<sub>2</sub>, 20 mM HEPES (pH 7.3), 0.2% BSA) with 2.8 mM glucose twice, and preincubated in SAB for  
465 2 h at 37°C. The cells were then stimulated during static incubation for 5 min, 15 min, 30 min or 1 h in  
466 500 μl SAB containing 2.8 or 16.7 mM glucose with SD antibody (1:200). Then the cells were directly  
467 fixed by 2% PFA in PBS buffer pH 7.4 (containing 137 mM NaCl, 2.7 mM KCl, 8 mM Na<sub>2</sub>HPO<sub>4</sub>, and  
468 2 mM KH<sub>2</sub>PO<sub>4</sub>) for 10 min and permeabilized with Perm buffer (Thermo Fisher, USA) for 15 min.  
469 Unspecific binding was blocked by a buffer supplemented with 5% normal donkey serum in PBS. For  
470 biotin-streptavidin binding, 1 μM Streptavidin-Alexa 647 in blocking buffer was added to the cells and  
471 placed at room temperature for 30-40 min. The cells were washed three times with 5% normal donkey  
472 serum in PBS. After the reaction, the cells were washed three times with the washing buffer with tween-  
473 20, but without donkey serum. The samples were stored at 4°C for dSTORM imaging within 3-4 days.

474 **Imaging buffers.** The dSTORM imaging was performed in the imaging buffer described  
475 previously(Dempsey *et al.*, 2011). Briefly, the imaging buffer contained 1X TN buffer (50 mM Tris, pH  
476 8.0), 0.5 mg/ml glucose oxidase (Sigma, USA), 25 μg/ml catalase (Sigma, USA) and 25 mM MEA  
477 (cysteamine); 1 M MEA was stored at -20°C and used immediately after thawing. The buffer was

478 prepared and stored at 4°C for use within 5 days. Before dSTORM imaging, 50 % (w/v) stock glucose  
479 was added to the buffer with a final 10% glucose in the imaging buffer. The imaging buffer was only  
480 used for the day with imaging experiments.

481 **Microscopy setup.** dSTORM imaging was performed on the ELYRA P1 imaging system (Zeiss  
482 Germany). The system included an inverted microscope with 100X oil immerse objective lens with 1.46  
483 NA and configured for additional ultra total internal reflection fluorescence (uTIRF). The samples were  
484 mounted in the ZEISS level adjustable insert holder and placed on the PIEZO stage with focus lock  
485 function. The focus plane and imaging field were observed and selected by transmitting beam or full-  
486 length UV lights. The fluorescence dyes were excited by the selected three laser lines, 488 nm, 543 nm  
487 and 633 nm. Accordingly, filter sets #4 for collection of the emission lights were chosen dependent on  
488 the fluorescence dyes. For Alexa 488, the 488 nm laser line was used for excitation and the emission  
489 light filtered BP 495-550; for Alexa 546, a 543 nm laser line was used for excitation and the emission  
490 light filtered BP 570-620; for Alexa 647, a 633 nm laser line was used for excitation and the emission  
491 light filtered LP 655. The images were acquired onto a 256 x 256 pixel frame of an electron-multiplying  
492 charge coupled device (EMCCD) camera (iXon DU897, Andor).

493 **Acquisition imaging at EPI model or TIRF model.** For dSTORM imaging, an aliquot of 200 µl of the  
494 imaging buffer as described above was added to the glass-bottom chamber, which was mounted by a  
495 level auto-adjusted holder (Zeiss, Germany). Single channel imaging was performed with single laser  
496 line for the according dyes through a TIRF geometry. For EPI model, the focus position was set as above  
497 as 2.5 µm to the plasma membrane and the position was locked by Piezo autofocus functions which  
498 allowed the 5 nm vibration. For the TIRF model, the focus position was on the plasma membrane within  
499 150 nm distance to glass surface. Under constant illumination with 488 nm, 543nm or 642 nm laser light  
500 excitation in the imaging plane, the images, of which typically 20,000 frames were collected with  
501 exposure time of 18 ms, were acquired continuously until the blinking molecules of one dye observed  
502 were negligible. To generate the dSTORM images, the PALM processing function in the ZEN software  
503 was applied. First, the overlapping signals were discarded using a multi-emitter model for the whole  
504 image sequences. Second, to distinguish the real signal peak, the mask size was set to 7 pixels for anti-

505 insulin single domain antibody and anti-insulin IgG antibody. For both antibodies anti-insulin IgG and  
506 SD, the ratio of signal/noise was set to 6. After the filtration, the localization of blinking molecules was  
507 collected by 2D Gaussian function using a theoretical point spread function (PSF). The distribution of  
508 localization precision was calculated according to ZEN software.

509 **Two-channel dSTORM imaging.** The two laser lines, 488 nm and 633 nm were used to excite Alexa  
510 488 and Alexa 647 which labelled VAMP2 and insulin, respectively. The samples were alternately  
511 illuminated by the 633 nm and 488 nm laser lines. The filter set #2 for collection of the two emission  
512 lights was used through MBS 405/488/642 and EF BP 420-480/BP 495-560/LP 650 (Zeiss, Germany),  
513 which allows fast dual-channel acquisition with the same reflector module. To avoid unspecific  
514 excitation, the sample was orderly illuminated with the 633 nm laser line for 500 image frames followed  
515 by 500 images using the 488 nm laser line on the regions of interest (ROI) with 256 x 256 pixel frame.  
516 Both channels were acquired by the EMCCD camera with frequency of 18 ms per image. The image  
517 sequences were collected and the dSTORM images were rendered by ZEN software.

518 **Images analysis and rendering.** The image sequences were analysed using ZEN software (Zeiss,  
519 Germany). Lateral and axial drift during acquisition was corrected after reconstruction of dSTORM  
520 images using the Drift function of ZEN software. The drift function was tested by a fluorescent beads  
521 as fiducial marker before it was used to correct the images. After drift correction, the images were  
522 proceeded by grouping function. Finally, the present dSTORM images were corrected according to the  
523 following parameters: photon number, precision size, and first frame.

524 Unspecific signals resulting from cellular auto-fluorescence and nonspecific antibody binding, at times  
525 appeared on dSTORM images as low-density distribution. To remove the unspecific background, the  
526 molecules were filtered out if the number of molecules was less than 5 in an area of 100 nm perimeter.

527 **Measurement of insulin core sizes.** All images were exported in the raw TIF format for the analysis.  
528 The pixel density of localization for insulin cores was determined by Matlab with additional functions.  
529 The insulin core signals were segmented by using the function 2-D segmentation app. The area, average  
530 diameter and perimeter of each core were calculated by Matlab Region Analyser app.

531 **Transmission Electron Microscopy.** The knock-down and control cells were collected and prepared  
532 for electron microscopy for analysis of insulin granules as previously described (Olofsson et al., 2002).  
533 Briefly, the cells were fixed in 2.5% Glutaraldehyde in fresh Millionig's buffer (1.88% NaH<sub>2</sub>PO<sub>4</sub>·H<sub>2</sub>O  
534 (Sigma-Aldrich), 0.43% NaOH, pH 7.2) and refrigerated for 2 h. The cells were then post-fixed in  
535 osmium tetroxide (1%) for 1 h after a wash by Millionig's buffer. The fixed cells were dehydrated and  
536 embedded in AGAR 100 (Oxford Instruments Nordiska AB, Sweden) for the 100 nm ultrathin sections.  
537 The sections were placed on Cu-grids and images were acquired by a JEM electron microscope (JEOL-  
538 USA. Inc., USA). The diameter of cores in insulin granule was calculated using ImageJ 1.52 (NIH,  
539 Bethesda, MD, USA).

540 **Statistical analysis of data.** All data were presented as means ± SEM for the indicated number of  
541 observations or presented by a representative result obtained from at least three different experiments.  
542 The significances between different conditions were analysed by single factor ANOVA test and a p  
543 value less than 0.05 was considered a significant difference.

544

545 **Acknowledgements**

546 This project was funded by the Knut and Alice Wallenberg Foundation (2014-0074). Human islets  
547 were provided by the Nordic Network for Clinical Islet Transplantation and the EXODIAB Human  
548 Tissue Lab. We are grateful for the expert technical help of Anna-Maria Veljanovska Ramsay and  
549 valuable comments from Prof. Sara Linse (Lund University) and Prof. Patrik Rorsman (Oxford  
550 University). This work was also supported by the Swedish Foundation for Strategic Research  
551 (LUDC-IRC #15-0067) and by the Swedish Research Council through a Strategic Research Area  
552 grant (EXODIAB #2009-1039) and project grants to E.R., L.E., M.F.G. and E.Z. Science and  
553 Technology Guiding grant of Xiamen to NC. The work was also supported by grants from Region  
554 Skåne to E.R. and L.E., the Swedish Heart & Lund Foundation to M.F.G., the Albert Pålsson  
555 Foundation, the Crafoord Foundation, and the Diabetes Wellness foundation, to E.Z.

556 **Author contributions**

557 M.B., X.J., M.N., N.C., Y.Y., L.C. performed the experiments. U.K. analysed data. M.F.G. generated  
558 and phenotyped the Akita colony and contributed to the animal experiments. C.B.W., A.B. and L.E.  
559 participated in data interpretation and preparation of the manuscript. E.R. designed the study,  
560 analysed data and wrote the manuscript. E.Z. performed the experiments, designed the study,  
561 analysed data and wrote the manuscript. All authors reviewed and edited the manuscript and  
562 approved the final version of the manuscript.

563 **Competing interests**

564 The authors declare no competing financial interests.

565



566 References

- 567 Andersson, S.A., Olsson, A.H., Esguerra, J.L., Heimann, E., Ladenvall, C., Edlund, A., Salehi, A., Taneera,  
568 J., Degerman, E., Groop, L., et al. (2012). Reduced insulin secretion correlates with decreased  
569 expression of exocytotic genes in pancreatic islets from patients with type 2 diabetes. *Mol Cell*  
570 *Endocrinol* 364, 36-45. 10.1016/j.mce.2012.08.009.
- 571 Axelsson, A.S., Mahdi, T., Nenonen, H.A., Singh, T., Hanzelmann, S., Wendt, A., Bagge, A., Reinbothe,  
572 T.M., Millstein, J., Yang, X., et al. (2017). Sox5 regulates beta-cell phenotype and is reduced in type 2  
573 diabetes. *Nat Commun* 8, 15652. 10.1038/ncomms15652.
- 574 Brunner, Y., Coute, Y., Iezzi, M., Foti, M., Fukuda, M., Hochstrasser, D.F., Wollheim, C.B., and Sanchez,  
575 J.C. (2007). Proteomics analysis of insulin secretory granules. *Mol Cell Proteomics* 6, 1007-1017.  
576 10.1074/mcp.M600443-MCP200.
- 577 Colomer, V., Kicska, G.A., and Rindler, M.J. (1996). Secretory granule content proteins and the luminal  
578 domains of granule membrane proteins aggregate in vitro at mildly acidic pH. *Journal of Biological*  
579 *Chemistry* 271, 48-55. DOI 10.1074/jbc.271.1.48.
- 580 Cornu, M., Yang, J.Y., Jaccard, E., Poussin, C., Widmann, C., and Thorens, B. (2009). Glucagon-like  
581 peptide-1 protects beta-cells against apoptosis by increasing the activity of an IGF-2/IGF-1 receptor  
582 autocrine loop. *Diabetes* 58, 1816-1825. 10.2337/db09-0063.
- 583 Davidson, H.W., Rhodes, C.J., and Hutton, J.C. (1988). Intraorganellar calcium and pH control proinsulin  
584 cleavage in the pancreatic beta cell via two distinct site-specific endopeptidases. *Nature* 333, 93-96.  
585 10.1038/333093a0.
- 586 Del Prato, S., Marchetti, P., and Bonadonna, R.C. (2002). Phasic insulin release and metabolic  
587 regulation in type 2 diabetes. *Diabetes* 51 *Suppl* 1, S109-116.
- 588 Dempsey, G.T., Vaughan, J.C., Chen, K.H., Bates, M., and Zhuang, X. (2011). Evaluation of fluorophores  
589 for optimal performance in localization-based super-resolution imaging. *Nat Methods* 8, 1027-1036.  
590 10.1038/nmeth.1768.
- 591 Duncan, R.R., Greaves, J., Wiegand, U.K., Matskevich, I., Bodammer, G., Apps, D.K., Shipston, M.J., and  
592 Chow, R.H. (2003). Functional and spatial segregation of secretory vesicle pools according to vesicle  
593 age. *Nature* 422, 176-180. 10.1038/nature01389.
- 594 Eliasson, L., Abdulkader, F., Braun, M., Galvanovskis, J., Hoppa, M.B., and Rorsman, P. (2008). Novel  
595 aspects of the molecular mechanisms controlling insulin secretion. *J Physiol* 586, 3313-3324.  
596 10.1113/jphysiol.2008.155317.
- 597 Gandasi, N.R., Yin, P., Omar-Hmeadi, M., Ottosson Laakso, E., Vikman, P., and Barg, S. (2018). Glucose-  
598 Dependent Granule Docking Limits Insulin Secretion and Is Decreased in Human Type 2 Diabetes. *Cell*  
599 *Metab* 27, 470-478 e474. 10.1016/j.cmet.2017.12.017.
- 600 Gandasi, N.R., Yin, P., Riz, M., Chibalina, M.V., Cortese, G., Lund, P.E., Matveev, V., Rorsman, P.,  
601 Sherman, A., Pedersen, M.G., and Barg, S. (2017). Ca<sup>2+</sup> channel clustering with insulin-containing  
602 granules is disturbed in type 2 diabetes. *J Clin Invest* 127, 2353-2364. 10.1172/JCI88491.
- 603 Hanna, S.T., Pigeau, G.M., Galvanovskis, J., Clark, A., Rorsman, P., and MacDonald, P.E. (2009). Kiss-  
604 and-run exocytosis and fusion pores of secretory vesicles in human beta-cells. *Pflugers Arch* 457, 1343-  
605 1350. 10.1007/s00424-008-0588-0.
- 606 Heilemann, M., van de Linde, S., Schuttpelz, M., Kasper, R., Seefeldt, B., Mukherjee, A., Tinnefeld, P.,  
607 and Sauer, M. (2008). Subdiffraction-resolution fluorescence imaging with conventional fluorescent  
608 probes. *Angew Chem Int Ed Engl* 47, 6172-6176. 10.1002/anie.200802376.
- 609 Hickey, A.J., Bradley, J.W., Skea, G.L., Middleditch, M.J., Buchanan, C.M., Phillips, A.R., and Cooper, G.J.  
610 (2009). Proteins associated with immunopurified granules from a model pancreatic islet beta-cell  
611 system: proteomic snapshot of an endocrine secretory granule. *J Proteome Res* 8, 178-186.  
612 10.1021/pr800675k.
- 613 Hoboth, P., Muller, A., Ivanova, A., Mziaut, H., Dehghany, J., Sonmez, A., Lachnit, M., Meyer-Hermann,  
614 M., Kalaidzidis, Y., and Solimena, M. (2015). Aged insulin granules display reduced microtubule-

615 dependent mobility and are disposed within actin-positive multigranular bodies. *Proc Natl Acad Sci U*  
616 *S A* 112, E667-676. 10.1073/pnas.1409542112.

617 Hohmeier, H.E., Mulder, H., Chen, G., Henkel-Rieger, R., Prentki, M., and Newgard, C.B. (2000).  
618 Isolation of INS-1-derived cell lines with robust ATP-sensitive K<sup>+</sup> channel-dependent and -independent  
619 glucose-stimulated insulin secretion. *Diabetes* 49, 424-430.

620 Hong, E.G., Jung, D.Y., Ko, H.J., Zhang, Z., Ma, Z., Jun, J.Y., Kim, J.H., Sumner, A.D., Vary, T.C., Gardner,  
621 T.W., et al. (2007). Nonobese, insulin-deficient *Ins2Akita* mice develop type 2 diabetes phenotypes  
622 including insulin resistance and cardiac remodeling. *Am J Physiol Endocrinol Metab* 293, E1687-1696.  
623 10.1152/ajpendo.00256.2007.

624 Hu, Y.S., Cang, H., and Lillemeier, B.F. (2016). Superresolution imaging reveals nanometer- and  
625 micrometer-scale spatial distributions of T-cell receptors in lymph nodes. *Proc Natl Acad Sci U S A* 113,  
626 7201-7206. 10.1073/pnas.1512331113.

627 Hutton, J.C., Penn, E.J., and Peshavaria, M. (1982). Isolation and characterisation of insulin secretory  
628 granules from a rat islet cell tumour. *Diabetologia* 23, 365-373.

629 Lemaire, K., Ravier, M.A., Schraenen, A., Creemers, J.W., Van de Plas, R., Granvik, M., Van Lommel, L.,  
630 Waelkens, E., Chimienti, F., Rutter, G.A., et al. (2009). Insulin crystallization depends on zinc transporter  
631 ZnT8 expression, but is not required for normal glucose homeostasis in mice. *Proc Natl Acad Sci U S A*  
632 106, 14872-14877. 10.1073/pnas.0906587106.

633 Ligthart, S., van Herpt, T.T., Leening, M.J., Kavousi, M., Hofman, A., Stricker, B.H., van Hoek, M.,  
634 Sijbrands, E.J., Franco, O.H., and Dehghan, A. (2016). Lifetime risk of developing impaired glucose  
635 metabolism and eventual progression from prediabetes to type 2 diabetes: a prospective cohort study.  
636 *Lancet Diabetes Endocrinol* 4, 44-51. 10.1016/S2213-8587(15)00362-9.

637 Lyssenko, V., Jonsson, A., Almgren, P., Pulizzi, N., Isomaa, B., Tuomi, T., Berglund, G., Altshuler, D.,  
638 Nilsson, P., and Groop, L. (2008). Clinical risk factors, DNA variants, and the development of type 2  
639 diabetes. *N Engl J Med* 359, 2220-2232. 10.1056/NEJMoa0801869.

640 MacDonald, P.E., Braun, M., Galvanovskis, J., and Rorsman, P. (2006). Release of small transmitters  
641 through kiss-and-run fusion pores in rat pancreatic beta cells. *Cell Metab* 4, 283-290.  
642 10.1016/j.cmet.2006.08.011.

643 Mengistu, M., Tang, A.H., Foulke, J.S., Jr., Blanpied, T.A., Gonzalez, M.W., Spouge, J.L., Gallo, R.C., Lewis,  
644 G.K., and DeVico, A.L. (2017). Patterns of conserved gp120 epitope presentation on attached HIV-1  
645 virions. *Proc Natl Acad Sci U S A* 114, E9893-E9902. 10.1073/pnas.1705074114.

646 Nam, D., Mantell, J., Bull, D., Verkade, P., and Achim, A. (2014). A novel framework for segmentation  
647 of secretory granules in electron micrographs. *Med Image Anal* 18, 411-424.  
648 10.1016/j.media.2013.12.008.

649 Ogawa, A., Harris, V., McCorkle, S.K., Unger, R.H., and Luskey, K.L. (1990). Amylin secretion from the  
650 rat pancreas and its selective loss after streptozotocin treatment. *J Clin Invest* 85, 973-976.  
651 10.1172/JCI114528.

652 Olofsson, C.S., Gopel, S.O., Barg, S., Galvanovskis, J., Ma, X., Salehi, A., Rorsman, P., and Eliasson, L.  
653 (2002). Fast insulin secretion reflects exocytosis of docked granules in mouse pancreatic B-cells.  
654 *Pflugers Arch* 444, 43-51. 10.1007/s00424-002-0781-5.

655 Orci, L., Ravazzola, M., Amherdt, M., Madsen, O., Perrelet, A., Vassalli, J.D., and Anderson, R.G. (1986).  
656 Conversion of proinsulin to insulin occurs coordinately with acidification of maturing secretory vesicles.  
657 *J Cell Biol* 103, 2273-2281.

658 Ostenson, C.G., Gaisano, H., Sheu, L., Tibell, A., and Bartfai, T. (2006). Impaired gene and protein  
659 expression of exocytotic soluble N-ethylmaleimide attachment protein receptor complex proteins in  
660 pancreatic islets of type 2 diabetic patients. *Diabetes* 55, 435-440.

661 Regazzi, R., Sadoul, K., Meda, P., Kelly, R.B., Halban, P.A., and Wollheim, C.B. (1996). Mutational  
662 analysis of VAMP domains implicated in Ca<sup>2+</sup>-induced insulin exocytosis. *EMBO J* 15, 6951-6959.

663 Ries, J., Kaplan, C., Platonova, E., Eghlidi, H., and Ewers, H. (2012). A simple, versatile method for GFP-  
664 based super-resolution microscopy via nanobodies. *Nat Methods* 9, 582-584. 10.1038/nmeth.1991.

665 Rorsman, P., and Renstrom, E. (2003). Insulin granule dynamics in pancreatic beta cells. *Diabetologia*  
666 46, 1029-1045. 10.1007/s00125-003-1153-1.

667 Rothbauer, U., Zolghadr, K., Tillib, S., Nowak, D., Schermelleh, L., Gahl, A., Backmann, N., Conrath, K.,  
668 Muyldermans, S., Cardoso, M.C., and Leonhardt, H. (2006). Targeting and tracing antigens in live cells  
669 with fluorescent nanobodies. *Nat Methods* 3, 887-889. 10.1038/nmeth953.  
670 Rust, M.J., Bates, M., and Zhuang, X. (2006). Sub-diffraction-limit imaging by stochastic optical  
671 reconstruction microscopy (STORM). *Nat Methods* 3, 793-795. 10.1038/nmeth929.  
672 Schvartz, D., Brunner, Y., Coute, Y., Foti, M., Wollheim, C.B., and Sanchez, J.C. (2012). Improved  
673 characterization of the insulin secretory granule proteomes. *J Proteomics* 75, 4620-4631.  
674 10.1016/j.jprot.2012.04.023.  
675 Suckale, J., and Solimena, M. (2010). The insulin secretory granule as a signaling hub. *Trends Endocrinol*  
676 *Metab* 21, 599-609. 10.1016/j.tem.2010.06.003.  
677 Sudhof, T.C., and Rothman, J.E. (2009). Membrane fusion: grappling with SNARE and SM proteins.  
678 *Science* 323, 474-477. 10.1126/science.1161748.  
679 Thurmond, D.C., and Gaisano, H.Y. (2020). Recent Insights into Beta-cell Exocytosis in Type 2 Diabetes.  
680 *J Mol Biol* 432, 1310-1325. 10.1016/j.jmb.2019.12.012.  
681 Tsuboi, T., Ravier, M.A., Parton, L.E., and Rutter, G.A. (2006). Sustained exposure to high glucose  
682 concentrations modifies glucose signaling and the mechanics of secretory vesicle fusion in primary rat  
683 pancreatic beta-cells. *Diabetes* 55, 1057-1065.  
684 Wang, Z., and Thurmond, D.C. (2009). Mechanisms of biphasic insulin-granule exocytosis - roles of the  
685 cytoskeleton, small GTPases and SNARE proteins. *J Cell Sci* 122, 893-903. 10.1242/jcs.034355.  
686 Zhang, E., Mohammed Al-Amily, I., Mohammed, S., Luan, C., Asplund, O., Ahmed, M., Ye, Y., Ben-Hail,  
687 D., Soni, A., Vishnu, N., et al. (2019). Preserving Insulin Secretion in Diabetes by Inhibiting VDAC1  
688 Overexpression and Surface Translocation in beta Cells. *Cell Metab* 29, 64-77 e66.  
689 10.1016/j.cmet.2018.09.008.

690

691 **Figures**

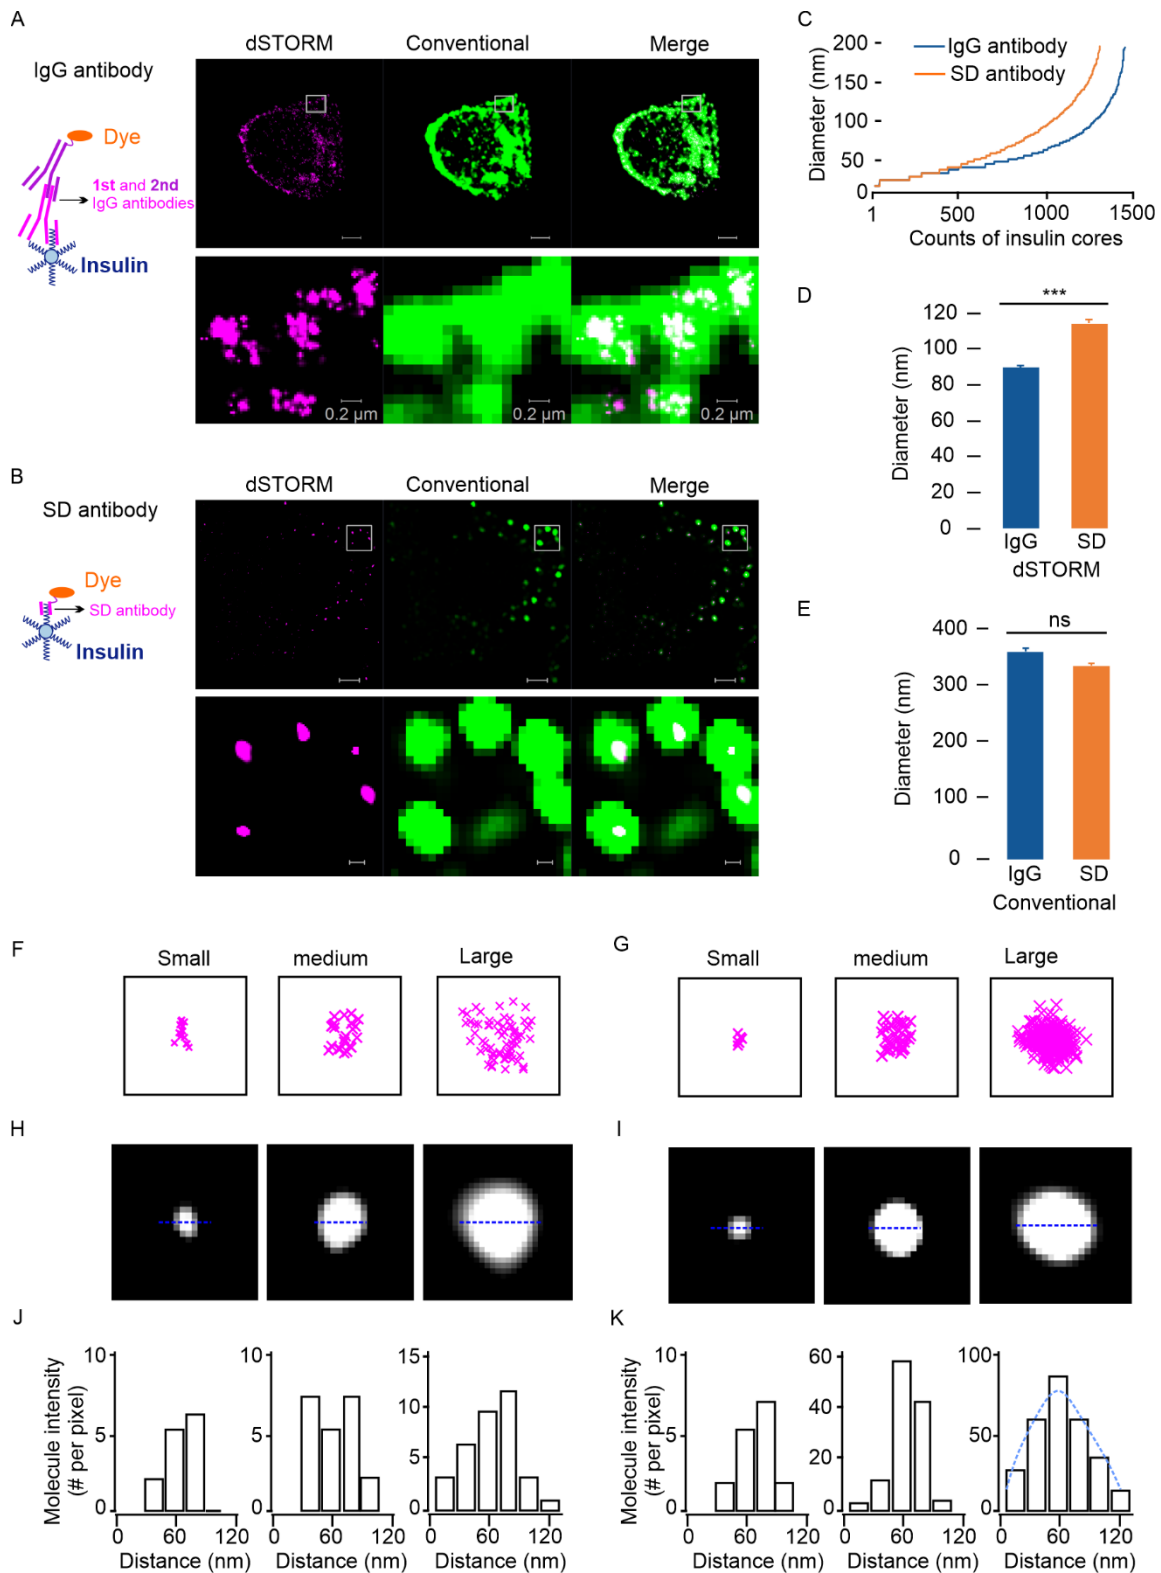

692

693 **Figure 1. Comparison of insulin core sizes as detected by IgG and single domain (SD) insulin**

694 **antibodies. (A) Insulin core size detection in insulin-secreting Ins-1(832/13) cells by an IgG primary**

695 insulin antibody plus the second antibody conjugated with Alexa 647 (left) with representative dSTORM  
696 images detected (right). Magnified images are cut from the squared regions indicated in the upper images  
697 (right bottom). (B) Same as in (A), but detection is done using single domain antibodies conjugated with  
698 Alexa 647. (C) Diameter of insulin cores using IgG or SD antibodies detected by dSTORM imaging.  
699 The data was collected from 1280 granules by IgG and 1450 granules by SD in 18 cells. (D) The average  
700 diameters of insulin cores were larger when assessed using SD antibodies than by IgG antibodies in  
701 dSTORM images, but no difference was seen in conventional images (E). (F) Insulin molecule density  
702 in small (left, ~60 nm), medium (~90 nm) or large (right, ~120 nm) insulin cores measured with IgG  
703 insulin antibodies or (G) with SD insulin antibodies. (H) Selected insulin cores of small, medium and  
704 large sizes were detected by IgG insulin antibodies. (I) same as in (H) but detected by SD insulin  
705 antibodies. (J) The distribution of molecular intensity (the insulin molecules per pixel measured  
706 following the equatorial section of the insulin cores) when measured in insulin core of small, medium  
707 and large sizes with IgG insulin antibodies and (K) with SD insulin antibodies. Data presented as means  
708  $\pm$  SEM and collected from 18 cells in three independent experiments. \*  $p < 0.05$ ; ns, no significance.

709

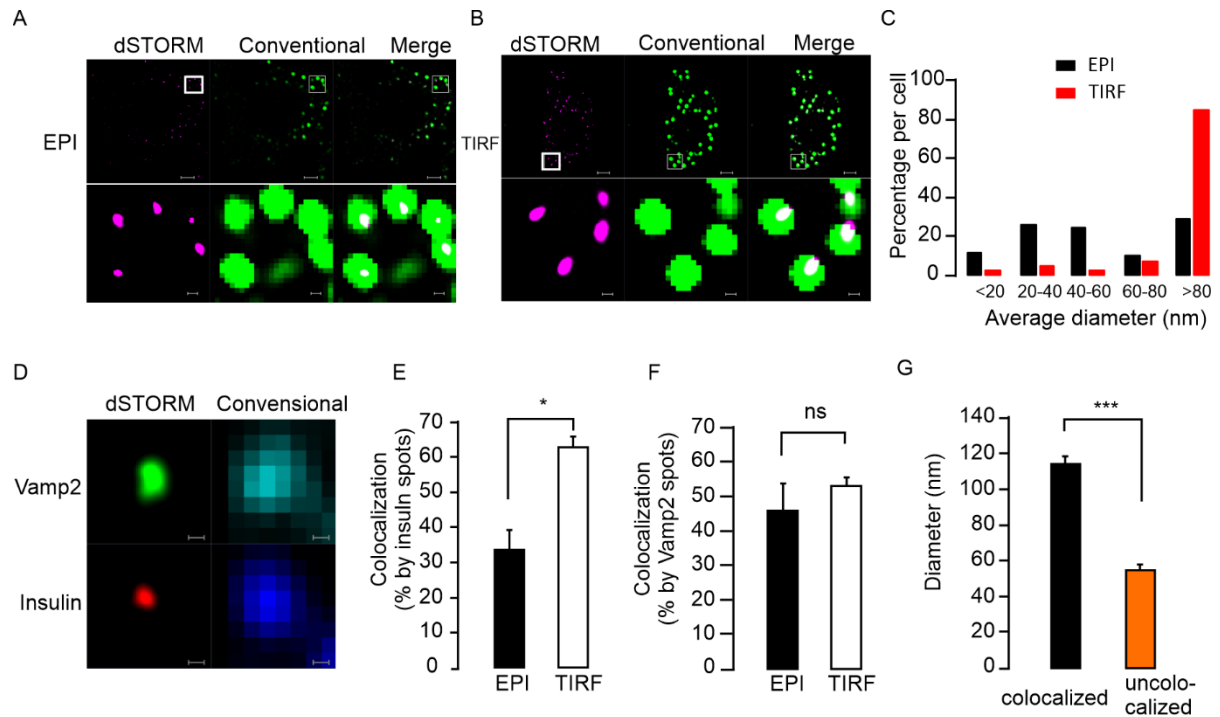

710

711

712 **Figure 2. Large insulin cores preferentially locate near the plasma membrane.** (A) dSTORM  
 713 images of insulin cores using SD antibodies in the epifluorescence (EPI) mode or (B) Total internal  
 714 reflection (TIRF) mode. The magnifications (lower panels) represent the squares indicated in the upper  
 715 images. (C) Distribution of insulin core diameters as measured in EPI or TIRF mode. (D) A single  
 716 insulin core colocalized with exocytotic marker Vamp2 visualized by two-colour dSTORM imaging. (E)  
 717 Fraction of insulin cores colocalized with Vamp2 to total insulin cores in EPI or TIRF mode. (F) same  
 718 as in (E), but when assessing the fraction of Vamp2 clusters colocalized with insulin cores to total  
 719 number of Vamp2 clusters. (G) Comparison of average insulin core diameters when colocalized, or not  
 720 with Vamp2. Data presented are means  $\pm$  SEM and collected from 21 INS-1(832/13) cells under each  
 721 condition from 3 independent experiments. Significance test performed with single factor ANOVA test.  
 722 \*  $p < 0.05$ ; \*\*\*,  $p < 0.001$ ; ns, no significance.

723

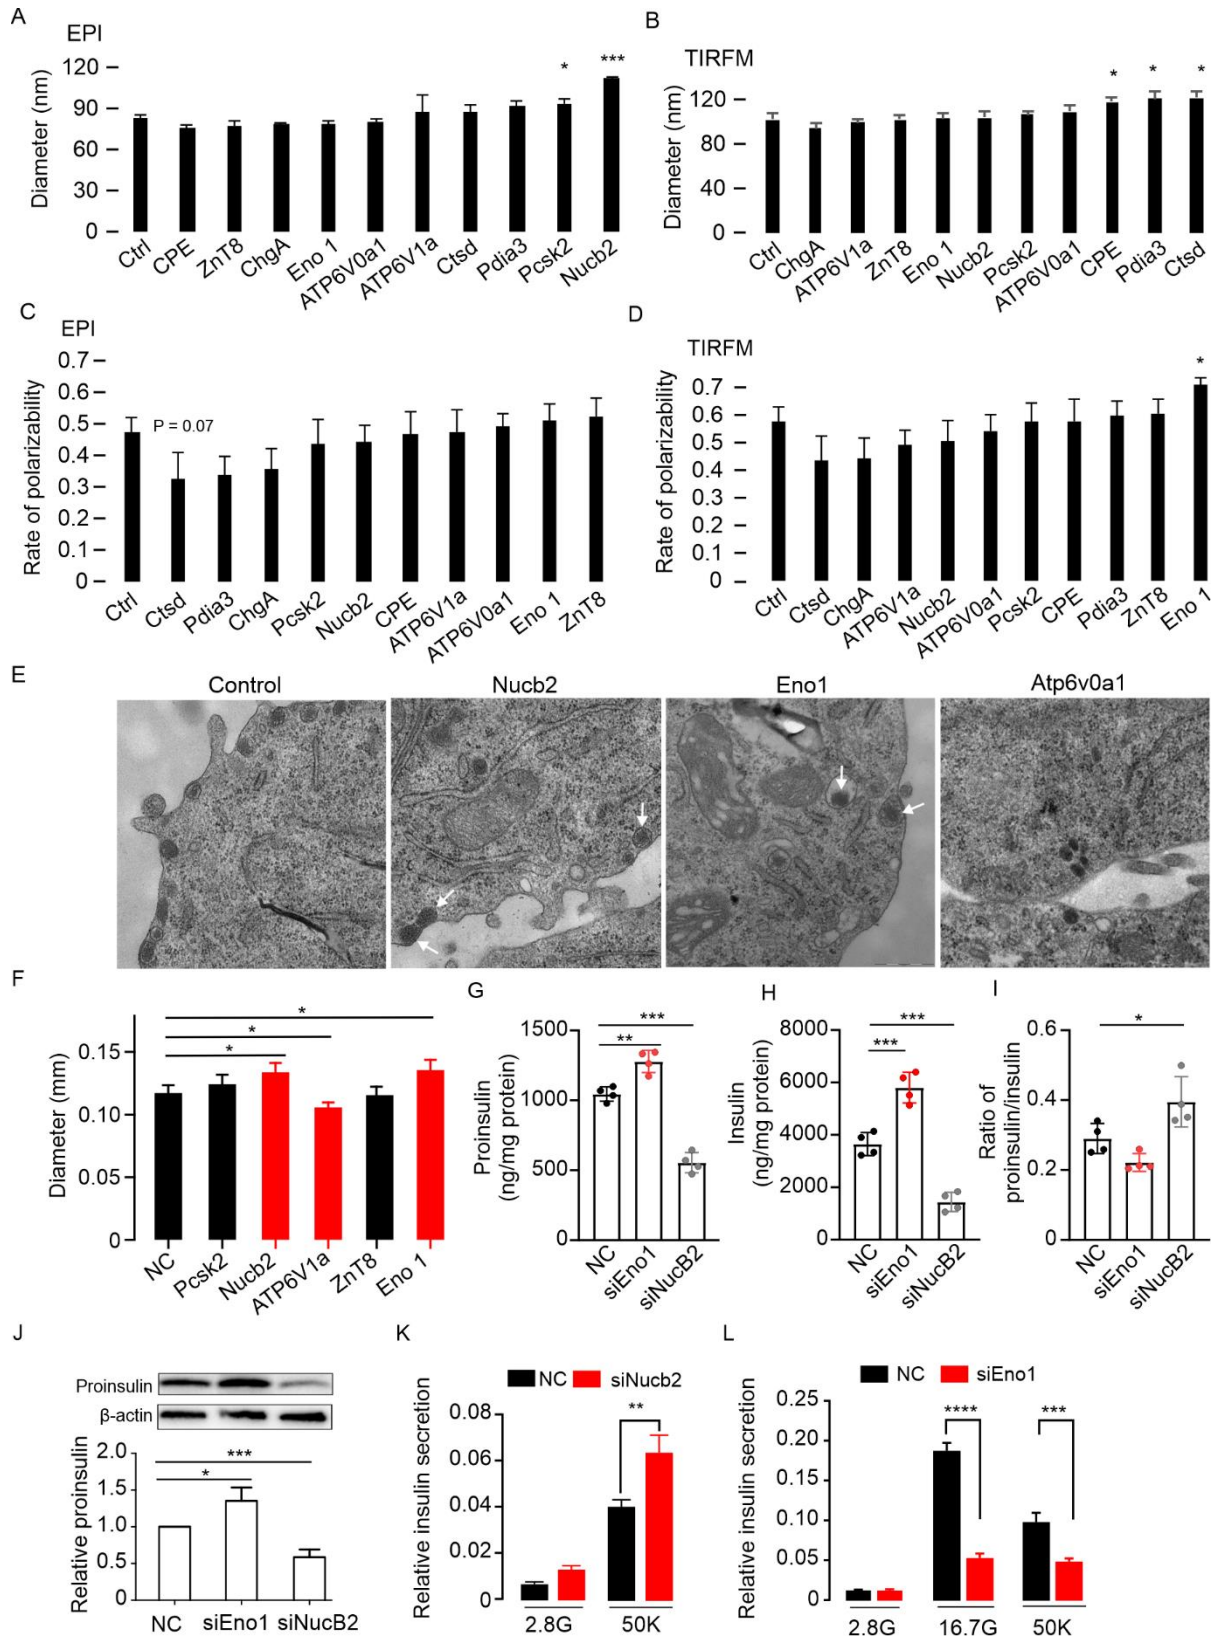

724

725 **Figure 3. Insulin granular proteins are involved in the regulation of insulin core size.** (A) Diameter  
 726 of insulin cores detected by dSTORM imaging under EPI (A) or TIRF mode (B) after 48 h knock-down  
 727 of the granular proteins. The rate of the polarizability of the insulin core shape was detected under the

728 same conditions as in (A) under EPI (C) or TIRF mode (D). (E) Representative TEM images of insulin  
729 granules after 48 h knock-down of the granular proteins. The arrows indicate the enlarged insulin cores  
730 in the Eno 1 or Nucleobindin 2 KD INS-1(832/13) cells. (F) Diameter of insulin cores detected by TEM  
731 imaging in the KD cells. Proinsulin (G), insulin (H) and ration of proinsulin/insulin (I) were measured  
732 in the Eno-1 and Nucb2 silencing INS-1 cells. (J) The proinsulin in the cells was measured by western  
733 blot. (K) The insulin secretion increased in the Nucleobindin 2 KD cells after 50 mM KCl stimulation  
734 of 10 min. (L) The inhibited insulin release in the Eno 1 KD cells after 50 mM KCl stimulation of 10  
735 min or incubation with 16.7 mM glucose for 1 h. All experiments were repeated independently at least  
736 3 times. Significance test performed with single factor ANOVA test. \*  $p<0.05$ ; \*\*,  $p<0.01$ ; \*\*\*,  $p<0.001$ .

737



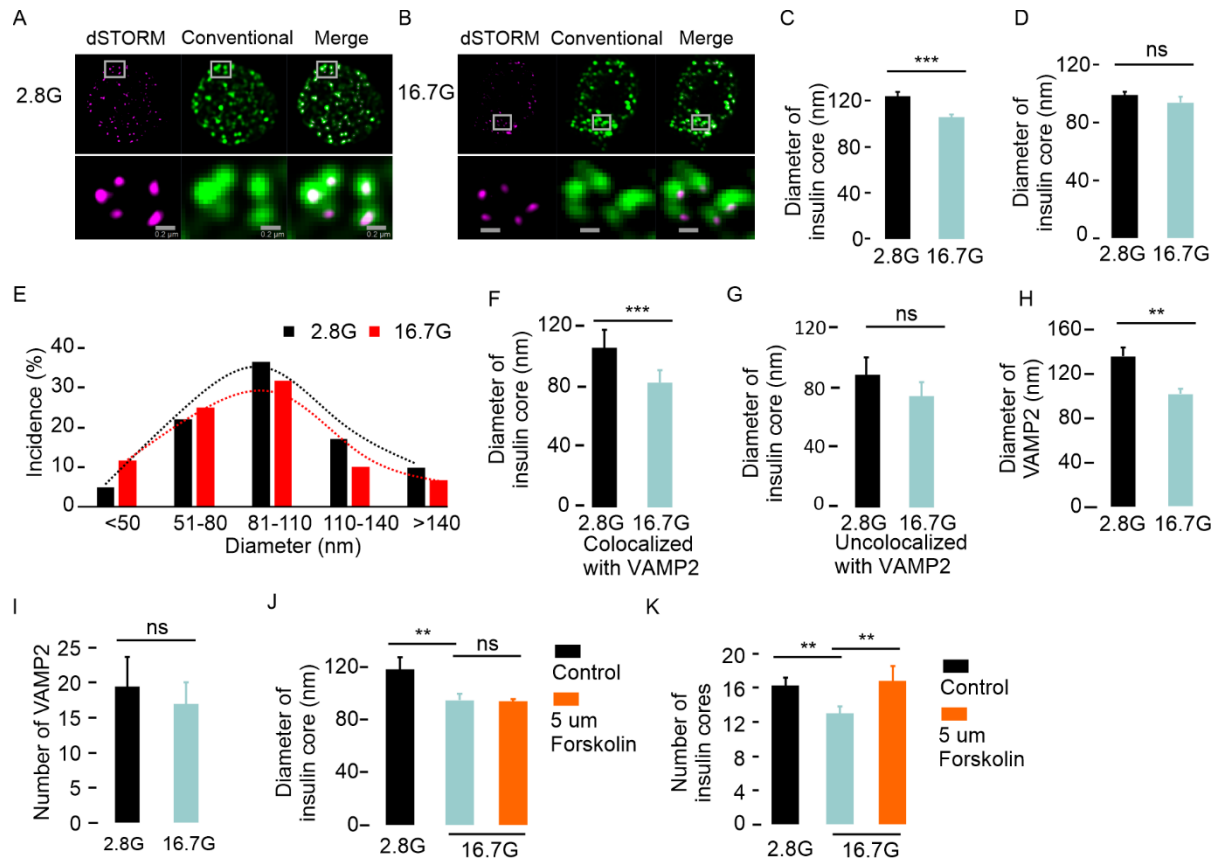

738

739 **Figure 4. Reduction of insulin granule core size after stimulation of primary human  $\beta$ -cells. (A)**

740 Representative images of insulin cores under TIRF mode after 1-h incubation in 2.8 mM or (B) 16.7

741 mM glucose, respectively. (C) Decrease of the diameters after stimulation with 16.7 mM glucose under

742 conditions as in (A), but no significant change was visualized by conventional imaging (D). (E) the

743 distribution curve of the insulin cores indicated that the reduction mainly results from the population of

744 larger size. (F) The size of insulin cores decreased in the granules that colocalized with the exocytotic

745 marker VAMP2, but not in the granules without VAMP2 (G). (H) VAMP2 size reduced after 16.7 mM

746 glucose stimulation. (I) VAMP2 numbers on the surface detected by TIRF mode remained non-

747 significantly changed after 16.7 mM glucose stimulation. (J) Detection of insulin cores under stimulation

748 with 5  $\mu$ M forskolin plus 16.7 mM glucose stimulation for 30 min. (K) Number of surface insulin cores

749 detected under TIRF mode after 1 h treatment with 5  $\mu$ M forskolin and 16.7 mM glucose. Significance

750 test performed with single factor ANOVA test. \* p < 0.05; \*\*, p < 0.01; \*\*\*, p < 0.001, ns, no significance.

751

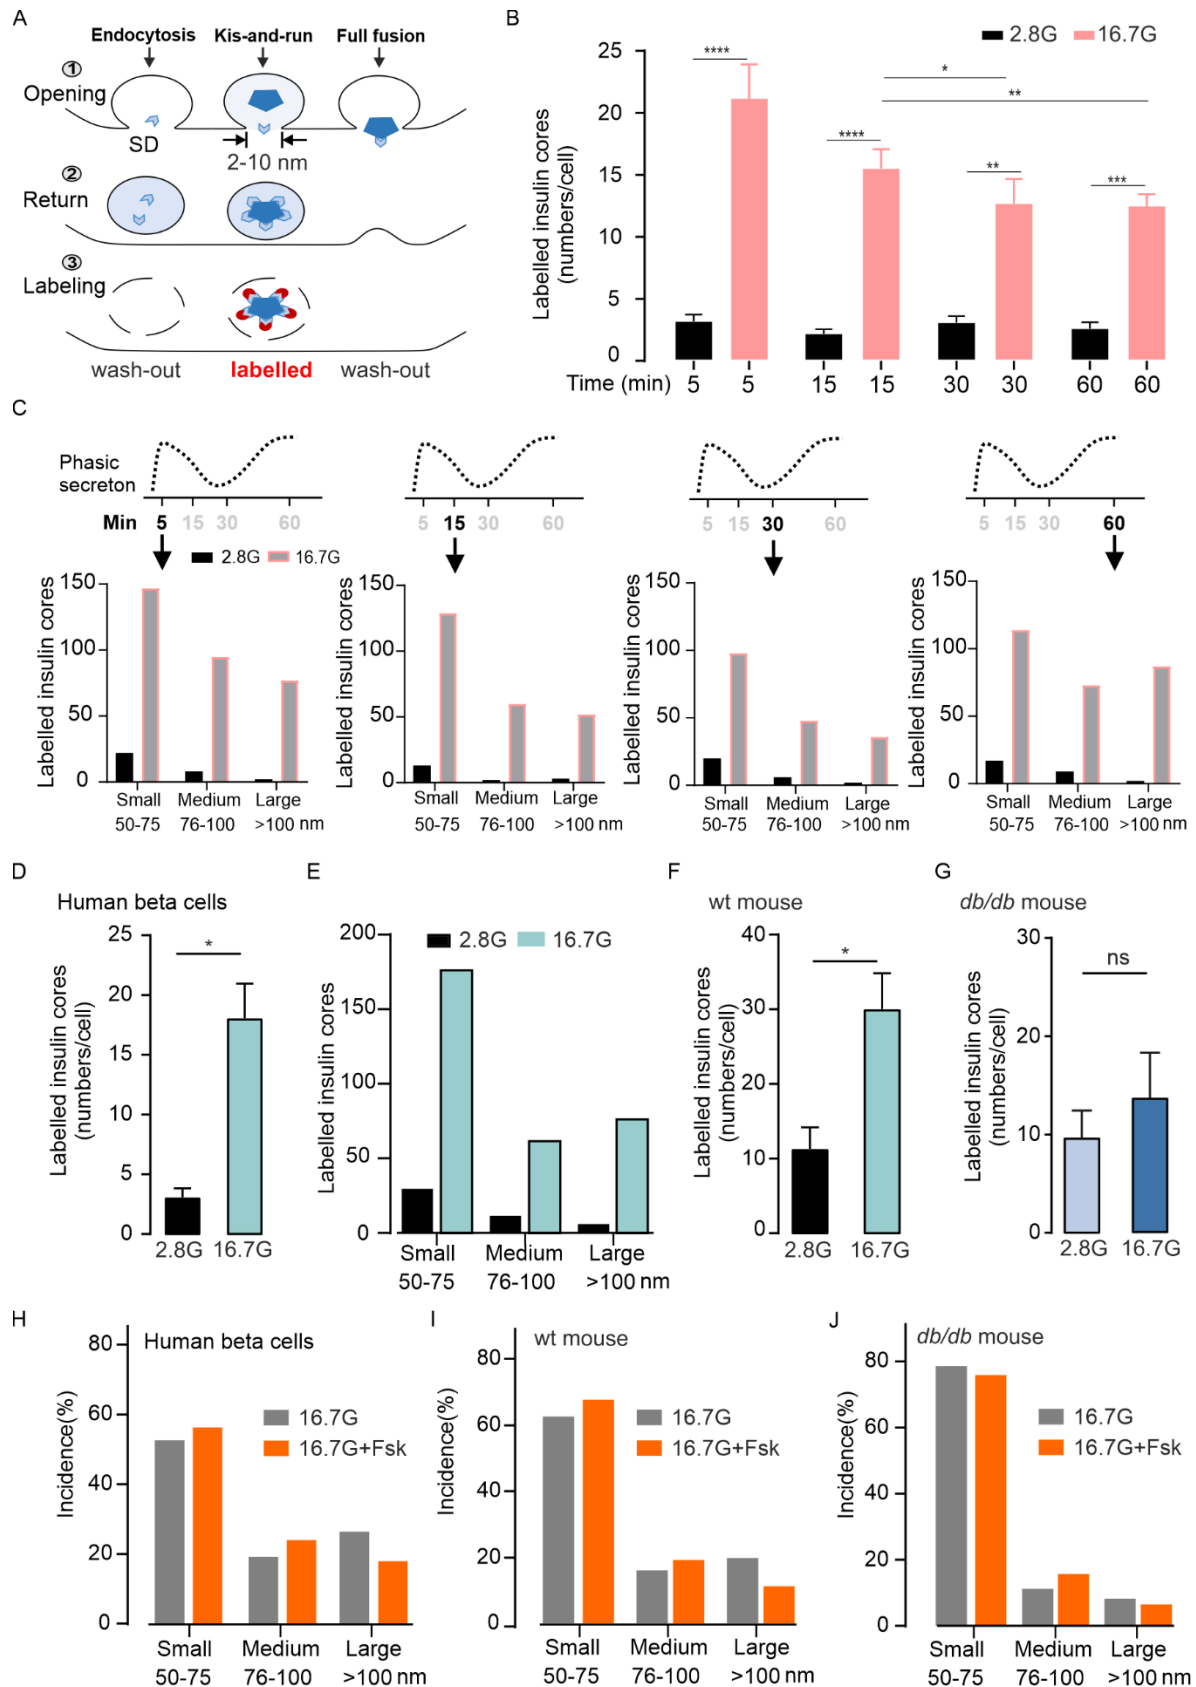

752

753 **Figure 5. Partial IGCs are released through the incomplete fusion of insulin granules. (A)**

754 Schematic of labelling IGCs during incomplete fusion (Kiss-and-run). Step 1, SD antibodies were

755 incubated with the cells during the stimulation. Step 2, SD-antibodies entered granules and bound to  
756 IGCs, in addition to some unspecific binding or endocytosis entry. Step 3, after standard staining  
757 protocol, only SD antibodies binding with IGCs remained. (B) The labelled insulin cores (number per  
758 cell) were measured in INS-1 832/13 cells after 2-h pre-incubation in 2.8 mM glucose then 5, 15, 30 and  
759 60 min stimulation in 2,8 or 16,7 mM glucose with 1:200 insulin SD antibodies, Data presented as means  
760  $\pm$  SEM. (C) Distributions of labelled IGCs according to the IGCs sizes. Same conditions as B. (D) The  
761 labelled insulin cores were measured in human beta cells during 60 min stimulation. Data was collected  
762 from 3 donors. (E) The distribution of IGCs in human beta cells. (F) The labelled insulin cores measured  
763 in beta cells of wild type mouse and (G) db/db mouse for 60 min stimulation. The distribution of IGCs  
764 after 5  $\mu$ M Forskolin treatment in beta cells of human (H), wild type mouse (I) and *db/db* mouse beta  
765 cells (J). Significance test performed with single factor ANOVA test. \*  $p < 0.05$ ; \*\*,  $p < 0.01$ ; \*\*\*,  
766  $p < 0.001$ ; ns, no significance.

767

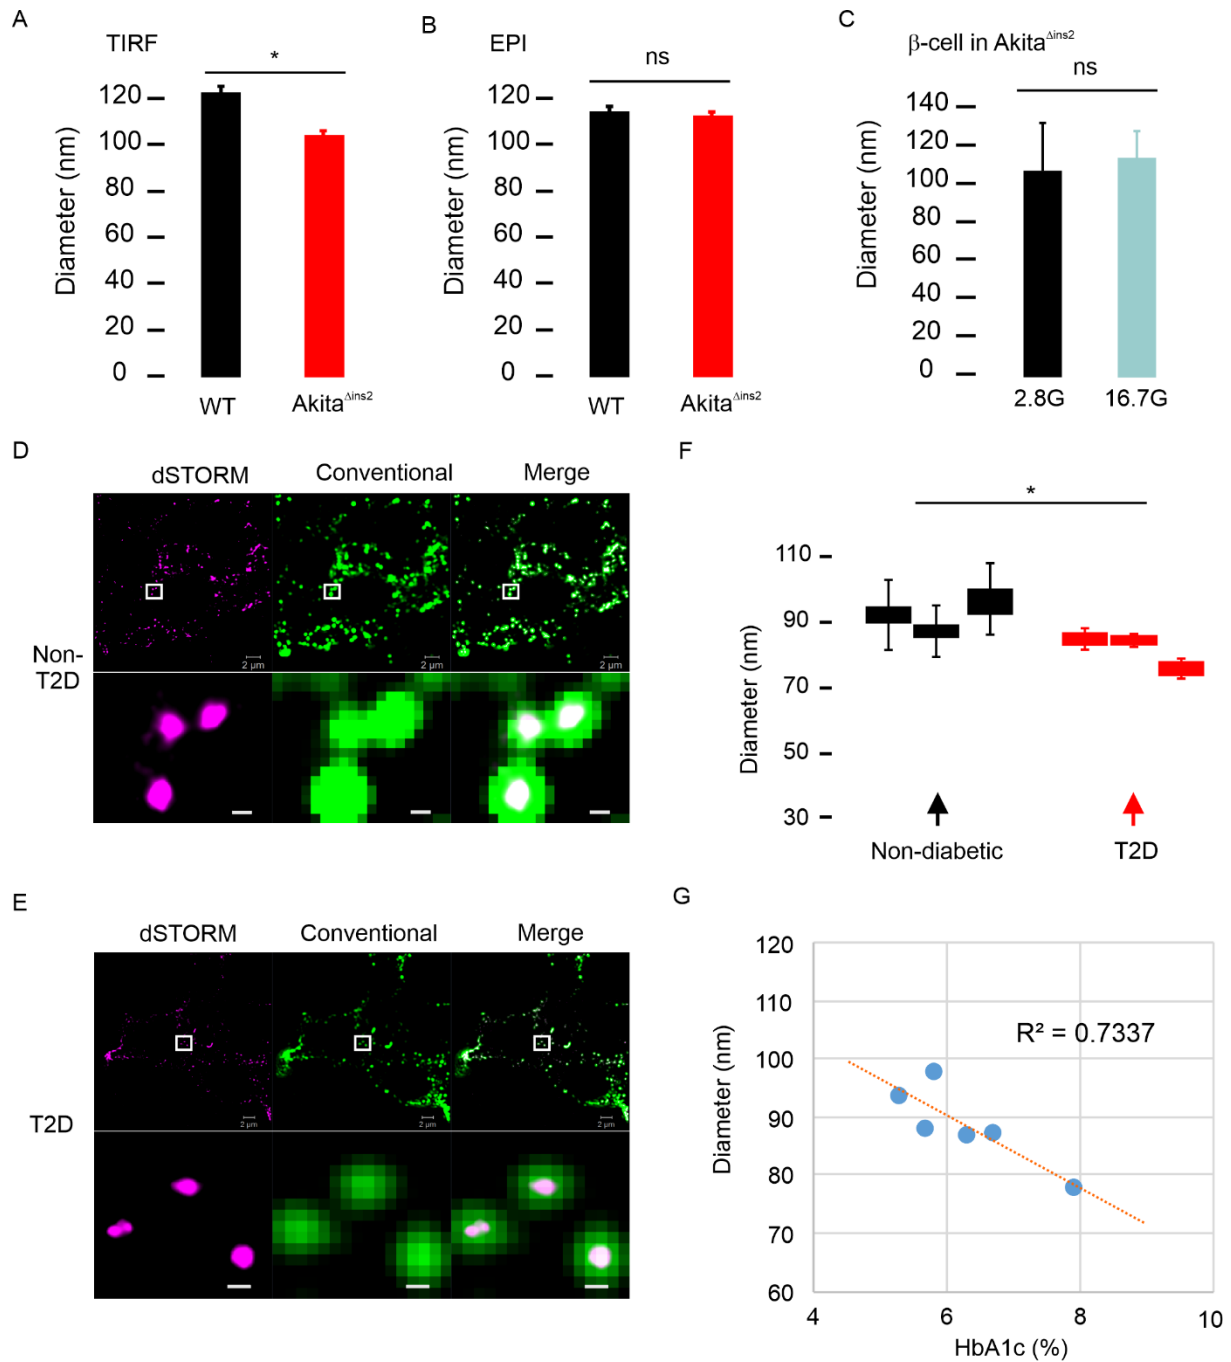

768

769 **Figure 6. The insulin cores in β-cells from T2D donors are smaller than those of non-diabetic. (A)**

770 Insulin core size in granules under TIRF mode was reduced in the Akita<sup>Δins2</sup> mice but remained

771 unchanged under EPI mode (B). (C) Glucose stimulation was unable to further reduce the insulin cores

772 in the Akita<sup>Δins2</sup> mice. (D) Representative dSTORM images of insulin cores were acquired from the

773 sections of the human pancreases from a healthy donor. The magnified images are from the squares as

774 indicated in the respective upper images. (E) Same as in (D), but the images are acquired from a donor

775 with type-2 diabetes. (F) The averages of average diameters of insulin cores were measured in healthy

776 and diabetic donors. (G) the correlation between the blood HbA1c and the size of IGCs in the human  
777 donors. Significance test for the experiments performed with single factor ANOVA test. \*  $p < 0.05$ ; ns,  
778 no significance.

779

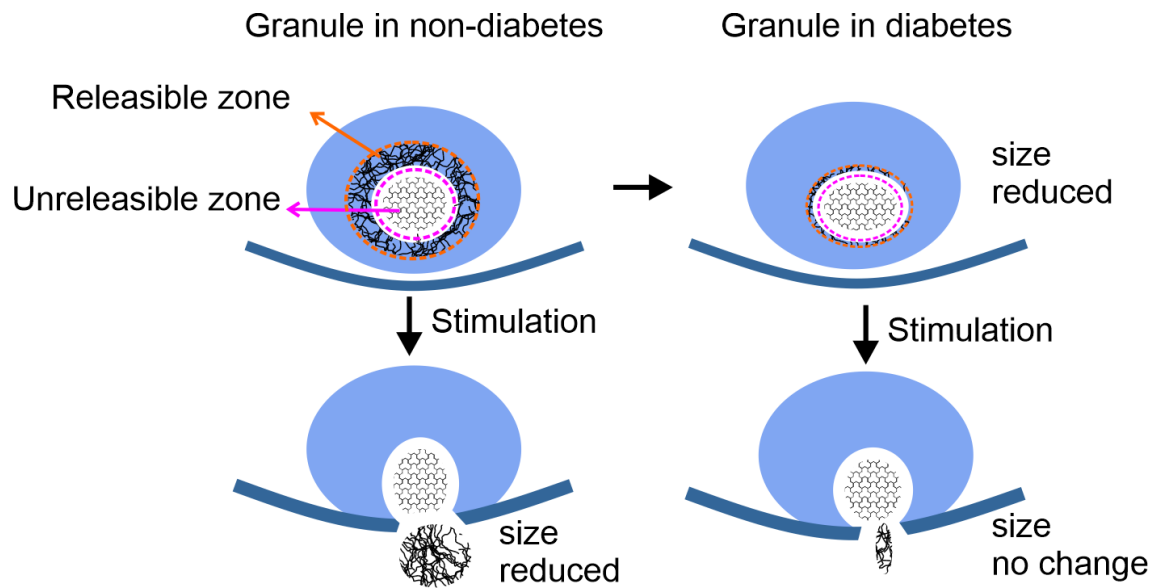

780

781

782 **Figure 7. Schematic illustration of insulin core reduction in  $\beta$ -cells of T2D islets is associated with**  
783 **deficiency of glucose-stimulated insulin secretion.** The insulin core is subdivided into the releasable  
784 zone and unreleasable zone. The releasable zone is secreted during the granule with incomplete fusion  
785 and resulted in reduction of core size. In the diabetic  $\beta$ -cell, the releasable zone is diminished, and  
786 therefore the size of the insulin cores remains unaltered after stimulation.

Supplemental information

**The structure of insulin granule core determines secretory capacity being reduced in type-2**

**diabetes**

Mohammad Barghouth<sup>1</sup>, Xiaoping Jiang<sup>1,2</sup>, Mototsugu Nagao<sup>1</sup>, Ning Chen<sup>1,3</sup>, Daowei Yang<sup>1</sup>,  
Yingying Ye<sup>1</sup>, Cheng Luan<sup>1</sup>, Maria F. Gomez<sup>1</sup>, Anna M. Blom<sup>4</sup>, Claes B Wollheim<sup>1,5</sup>, Lena Eliasson<sup>1</sup>,  
Erik Renström<sup>1,6</sup>, \* Enming Zhang<sup>1,6</sup>, \*

1, Department of Clinical Sciences in Malmö, Lund University Diabetes Centre, Lund University,  
Malmö, Sweden.

2, School of Physical Science & Technology, Southwest University, Chongqing, China

3, Department of Endocrinology, Xiamen Zhongshan Hospital Fudan University, Xiamen, China

4, Department of Translational Medicine, Lund University, Malmö, Sweden

5, Department of Cell Physiology and Metabolism, University Medical Centre, 1 rue Michel-Servet,  
1211 Geneva 4, Switzerland

6, NanoLund, Lund University, Box 118, 22100 Lund, Sweden

\*Correspondence should be addressed to E.R. ([erik.renstrom@med.lu.se](mailto:erik.renstrom@med.lu.se)) or E.Z.

([enming.zhang@med.lu.se](mailto:enming.zhang@med.lu.se))

**Table S1. Donor characteristics for the islets used in the experiments**

|         | <b>Number</b> | <b>Age</b> | <b>BMI</b> | <b>HbA1c (%)</b> | <b>Stimulatory<br/>index</b> | <b>Purity (%)</b> |
|---------|---------------|------------|------------|------------------|------------------------------|-------------------|
| Non-T2D | 13            | 63.61±3.7  | 25.9±0.98  | 5.56±0.08        | 6.2±1.9                      | 77.3±5.1          |
| T2D     | 6             | 59.8±4.3   | 33.73±4.1  | 6.43±0.35        | 2.53±0.67                    | 67.7±9.7          |



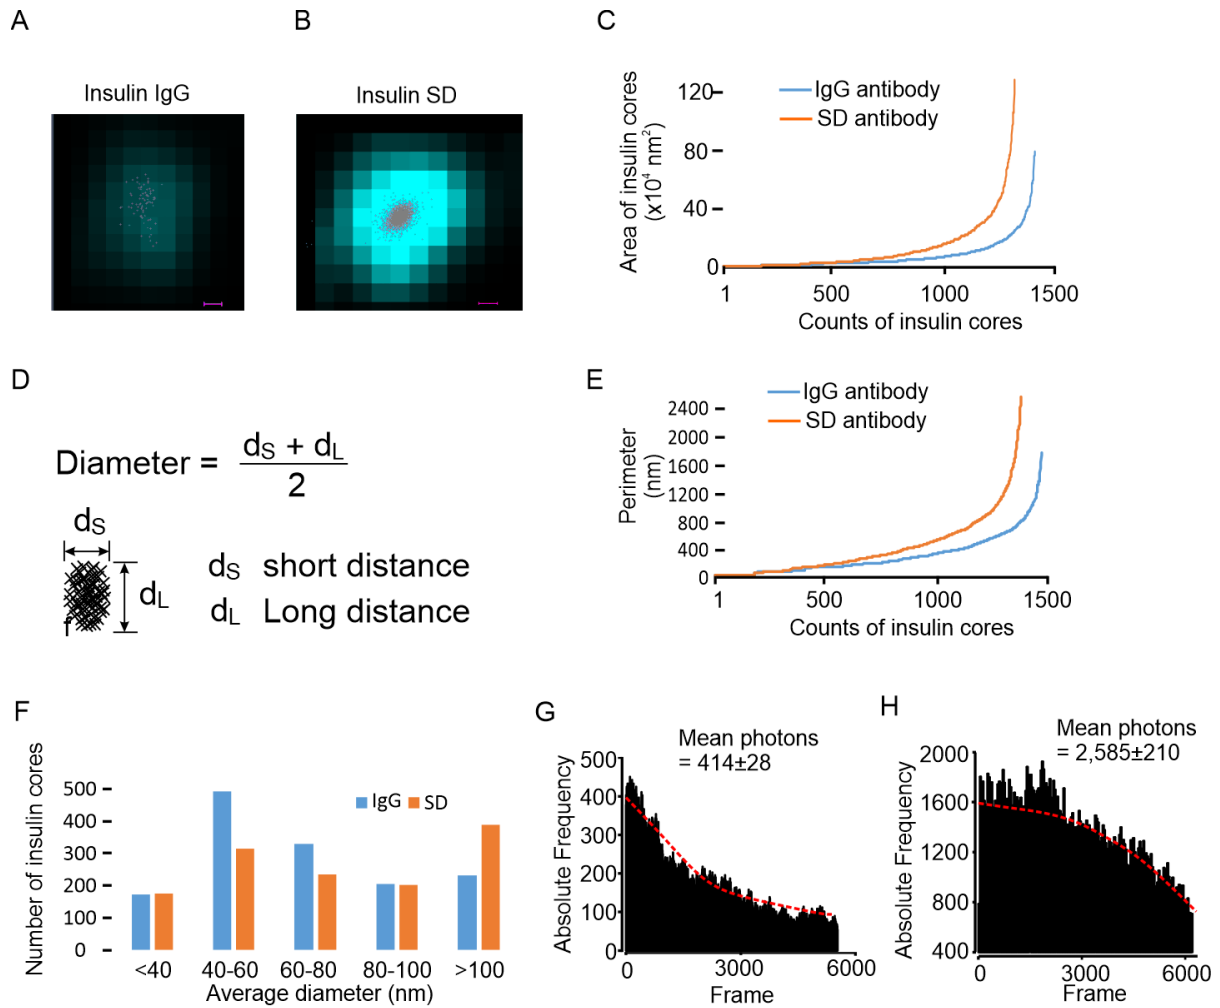

**Figure S1. Higher accuracy of insulin core size when visualized by SD antibody.** (A), distribution of molecular photons (grey spots) in a granular core with IgG antibody. The colour indicates the conventional image of the granule (Scale bar, 20 nm). (B), same as in a, but used SD antibody. (C) Area of insulin cores using IgG or SD antibodies detected by dSTORM imaging. The data were collected from 18 cells in each detection in three independent experiments. (D), the formula to calculate the diameter of insulin cores. (E) Same as in (C), but when measuring the perimeters. (F) The distribution of insulin cores detected by SD or IgG antibody-detected dSTORM imaging. Data are from 18 cells in three independent experiments. (G) The frequencies of photons per cell were measured using IgG insulin antibodies or SD insulin antibodies (H). Data presented are means  $\pm$  SEM and collected from 18 cells in three independent experiments.

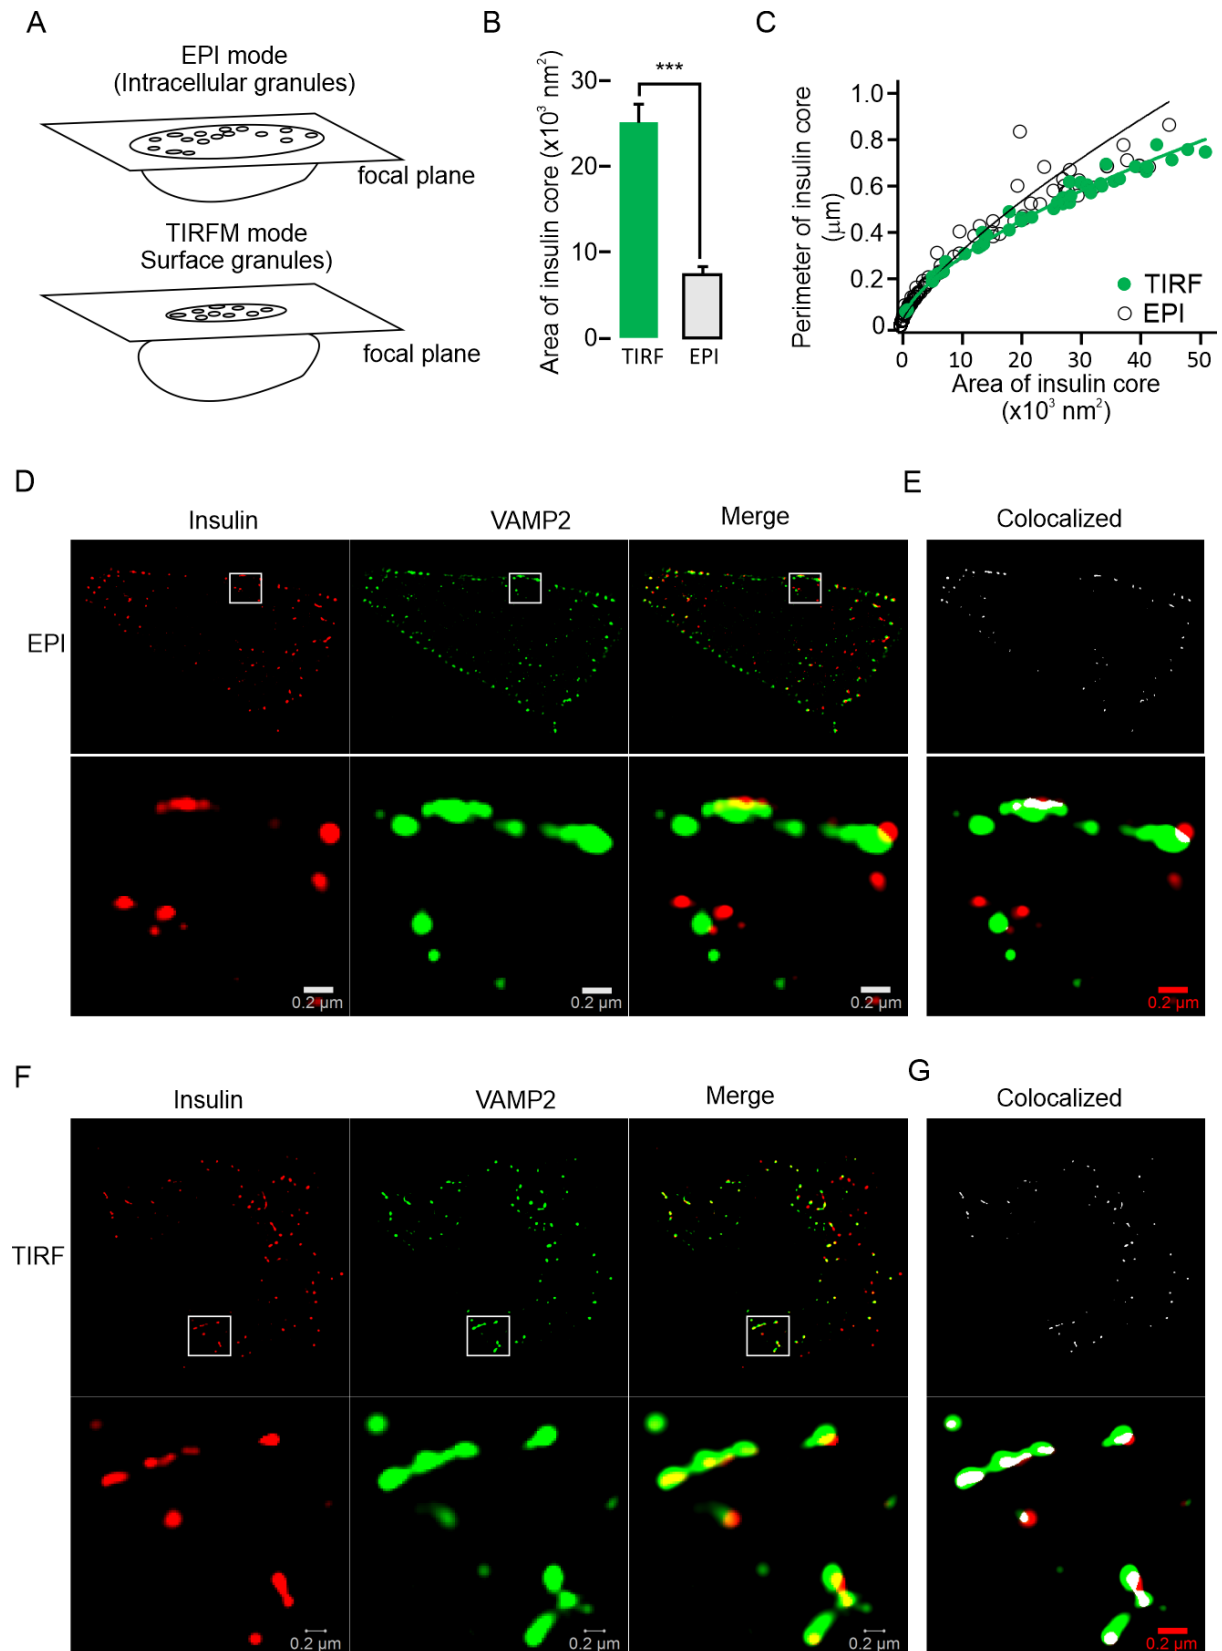

**Figure S2. Large insulin cores locate in exocytotic granules.** (A) illustrated the detection of EPI mode and TIRFM mode in a single cell. (B) The average insulin core area was measured under EPI or

TIRF mode. Significance test performed with single factor ANOVA test. \*\*\* $p < 0.001$ . (C) Comparison of correlations of perimeters and areas in EPI vs TIRF mode. The magenta hatched line indicates a positive linear correlation. Two-colour dSTORM images show the colocalization of insulin cores and VAMP2, an exocytotic large dense core insulin granule marker, in EPI (D) or TIRF mode (F). The processed images showed colocalization in white in EPI (E) or TIRF mode (G).

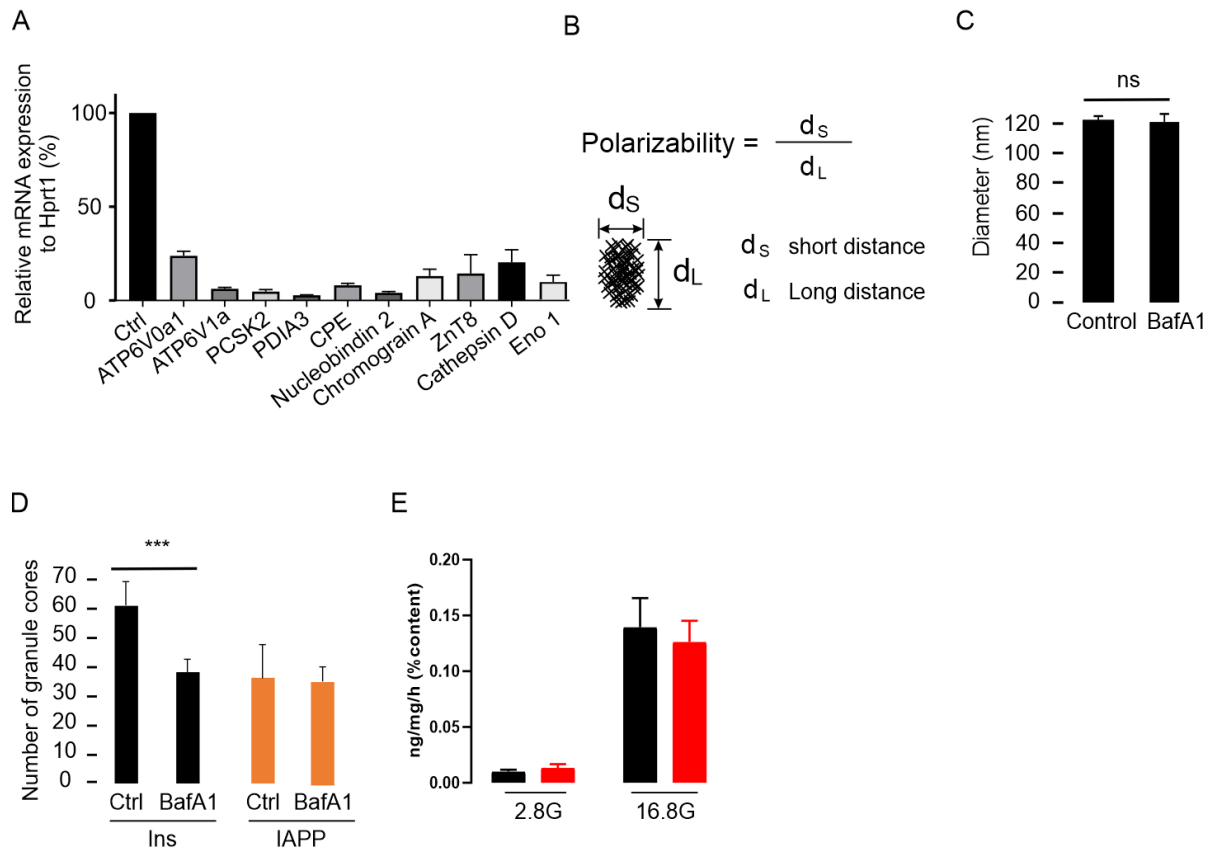

**Figure S3. Detectable insulin molecules regulated after KD of insulin granular proteins.** (A) Expression of the granular proteins after silencing by siRNA. (B) the formula used to calculate the rate of polarizability reflects the core shape from round (1) to long-stick state (0). (C) Insulin core size remained unchanged after 1 h of treatment with 0.5  $\mu$ M bafilomycin A1, H<sup>+</sup> ATPase inhibitor. (D) Surface insulin cores number detected by TIRF mode after treatment of bafilomycin A1. The IAPP size was also detected under the same conditions. Significance test for a-g performed with single factor ANOVA test. \*\*\* $p < 0.001$  (E) Glucose stimulated insulin secretion has no significant change after KD of nucleobindin 2 even though it showed the reductive tendency. Significance test performed with single factor ANOVA test. \*  $p < 0.05$ ; ns, no significance. All the experiments repeated at least three times independently.

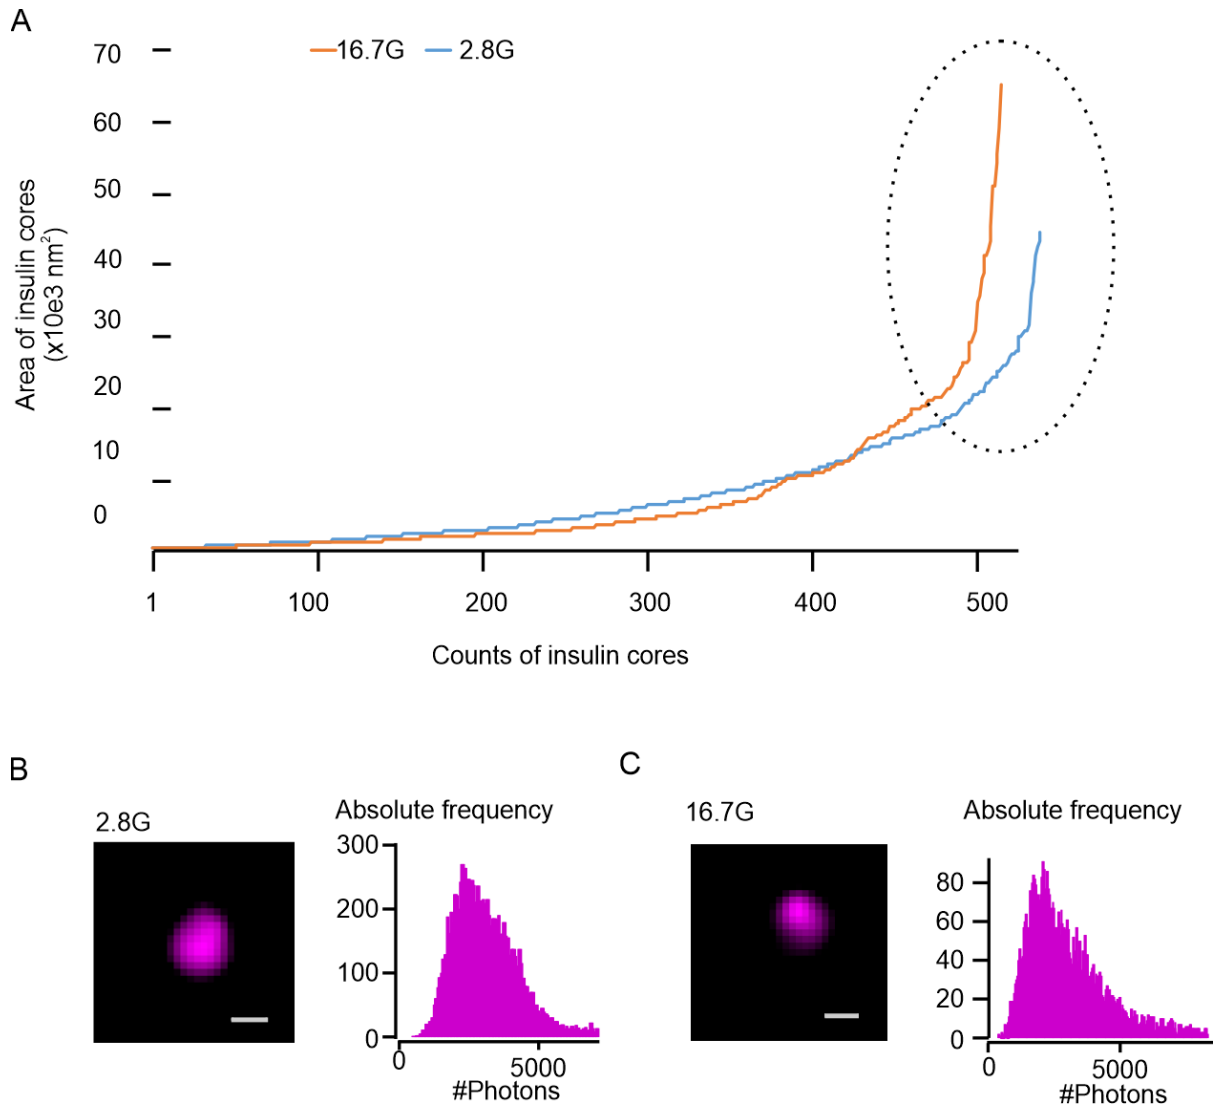

**Figure S4. Glucose stimulation reduced insulin cores in primary human pancreatic beta cells.** (A) Diameters of insulin core distributed from small to large with or without glucose stimulation. Notably, a smaller population (spot cycle) among large insulin cores showed under stimulation of glucose. (B) Representative image (left) and photon counts (right) in single insulin cores in cells incubated in 2.8 mM glucose. (C) same as in (B) but in glucose-stimulated (16.7 mM) cells.

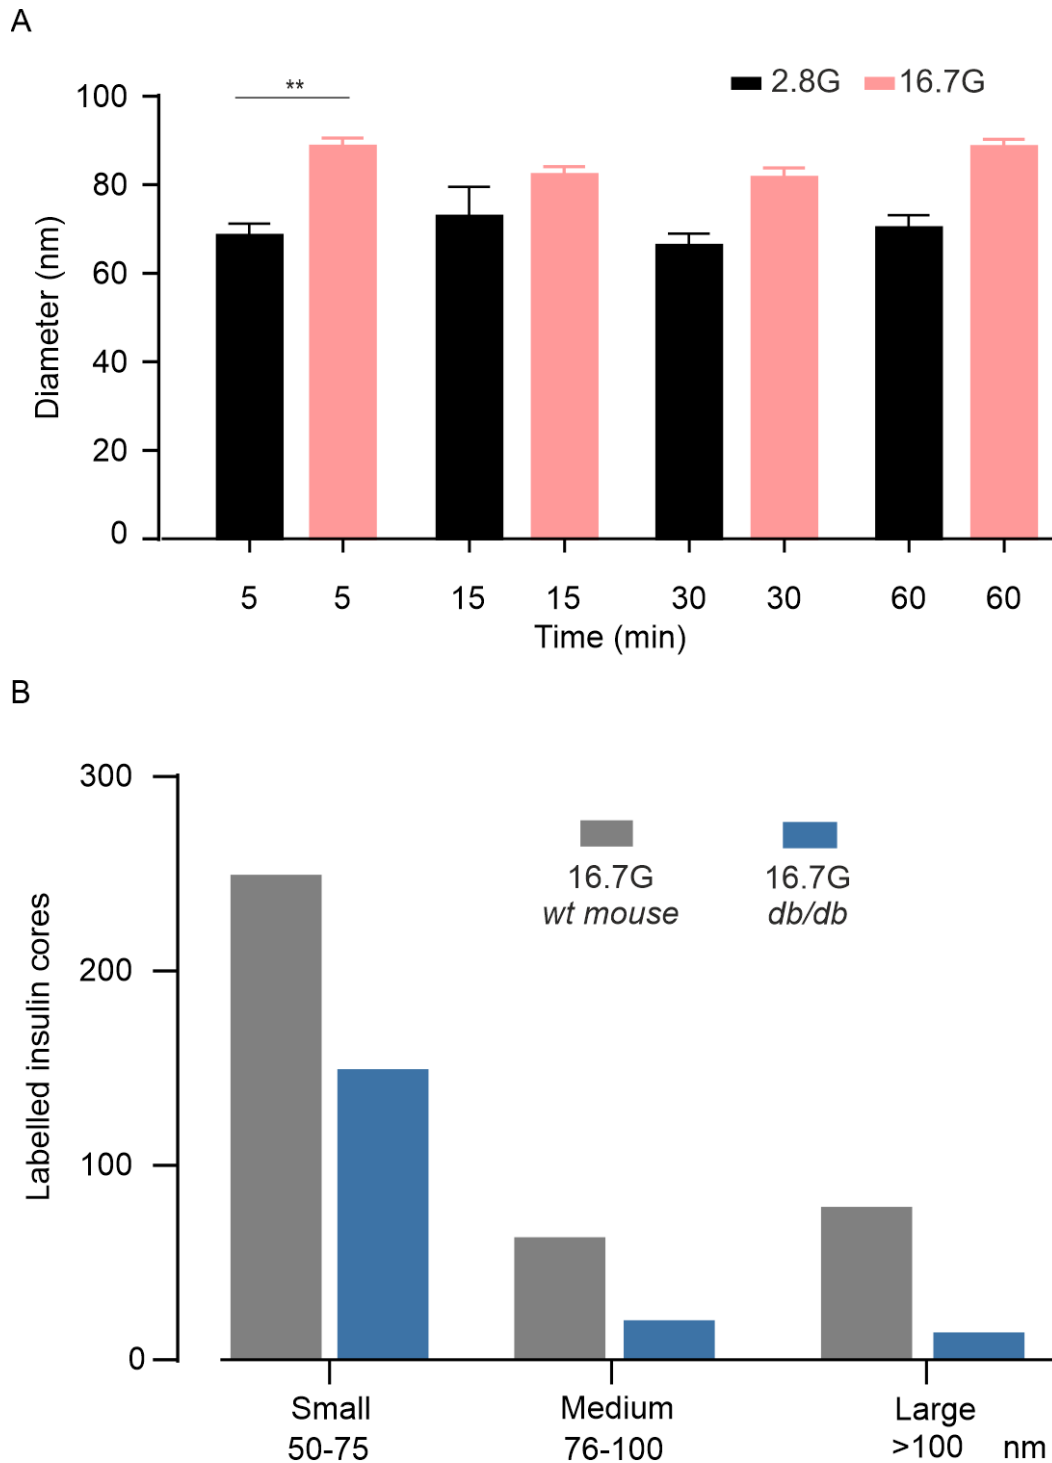

**Figure S5. IGCs size changes in the granules during incomplete fusion.** (A) The size of labelled insulin core in INS-1 832/13 cells after 2-h pre-incubation in 2.8 mM glucose then 5, 15, 30 and 60 min stimulation in 2,8 or 16,7 mM glucose with 1:200 insulin SD antibodies, Data presented as means  $\pm$  SEM. (B) The distribution of IGCs in beta cells in the wild type (*wt*) and diabetic *db/db* mouse. Significance evaluated by single-factor ANOVA. \*\*,  $p < 0.01$ .

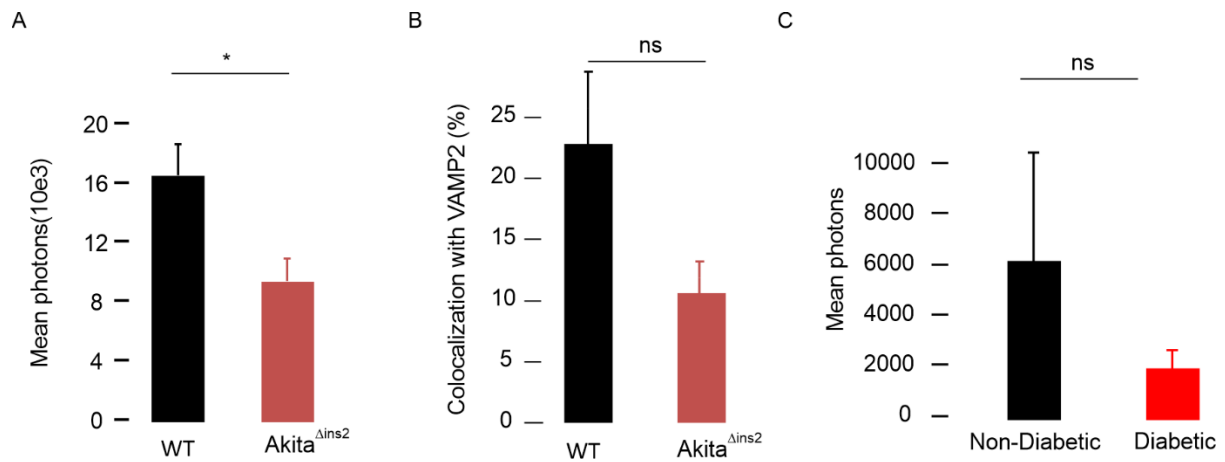

**Figure S6. Reduction of IGCs size in the diabetic mouse and human beta cells.** (A) Average mean photon counts per cell detected in Akita<sup>Δins2</sup> mice. (B) The percentage of insulin core co-localized with Vamp2 in control and Akita<sup>Δins2</sup> mice. (C) Average mean photon counts per cell in human b-cell. Data presented are means ± SEM and collected from 27 cells from each donor (three with diabetes and three without). Significance evaluated by single-factor ANOVA. \*, p<0.05; ns, no significance.
